1 **COLD ATMOSPHERIC PLASMA DIFFERENTIALLY AFFECTS CELL RENEWAL AND**  
2 **DIFFERENTIATION OF STEM CELLS AND APC-DEFICIENT-DERIVED TUMOR CELLS**  
3 **IN INTESTINAL ORGANOID**

4 Alia Hadeifi<sup>1,2\*</sup>, Morgane Leprovots<sup>1\*</sup>, Max Thulliez<sup>3#</sup>, Oriane Bastin<sup>3#</sup>, Anne Lefort<sup>1</sup>, Frédérick Libert<sup>1</sup>,  
5 Antoine Nonclercq<sup>3</sup>, Alain Delchambre<sup>3</sup>, François Reniers<sup>4</sup>, Jacques Devière<sup>2</sup> and Marie-Isabelle  
6 Garcia<sup>1\$</sup>

7  
8 <sup>1</sup>Institut de Recherche Interdisciplinaire en Biologie Humaine et Moléculaire (IRIBHM), Faculty of  
9 Medicine, Université Libre de Bruxelles ULB, Route de Lennik 808, 1070, Brussels, Belgium.

10 <sup>2</sup>Department of Gastroenterology, Hepatopancreatology and Digestive Oncology, C.U.B. Hôpital  
11 Erasme, Laboratory of Experimental Gastroenterology, Route de Lennik 808, 1070, Brussels, Belgium.

12 <sup>3</sup>Bio-, Electro- and Mechanical- system (BEAMS), Biomed Group, Ecole polytechnique de Bruxelles,  
13 av. F.D. Roosevelt 50 CP165/56 - 1050 Brussels, Belgium.

14 <sup>4</sup>Chemistry of Surfaces, Interfaces, and Nanomaterials, ChemSIN cp 255, Université libre de Bruxelles,  
15 Faculty of Sciences, Brussels, Belgium.

16

17 \* First co-authors # Second co-authors

18 \$ **Corresponding author:** Marie-Isabelle Garcia: [Marie.Garcia@ulb.be](mailto:Marie.Garcia@ulb.be)

19 Phone: + 32 2 555 4195

20

21 **Keywords:** Cold Atmospheric plasma, stem cells, tumor cells, organoids, regeneration, intestine, cell  
22 death, apoptosis, Reactive Oxygen Species

23 **Running title:** CAP effects on intestinal organoid growth and differentiation

24 **Word count:** 4, 335 words (references and Materials and methods excluded)

## 25 **ABSTRACT**

26 Cold atmospheric plasma (CAP) treatment has been proposed as a potentially innovative therapeutic  
27 tool in the biomedical field, notably for cancer due to its proposed toxic selectivity on cancer cells versus  
28 healthy cells. In the present study, we addressed the relevance of three-dimensional organoid technology  
29 to investigate the biological effects of CAP on normal epithelial stem cells and tumor cells isolated from  
30 mouse small intestine. CAP treatment exerted dose-dependent cytotoxicity on normal organoids and  
31 induced major transcriptomic changes associated with global response to oxidative stress, fetal-like  
32 regeneration reprogramming and apoptosis-mediated cell death. Moreover, we explored the potential  
33 selectivity of CAP on tumor-like Apc-deficient versus normal organoids in the same genetic  
34 background. Unexpectedly, tumor organoids exhibited higher resistance to CAP treatment, correlating  
35 with higher antioxidant activity at baseline as compared to normal organoids. This pilot study suggests  
36 that the *ex vivo* culture system could be a relevant alternative model to further investigate translational  
37 medical applications of CAP technology.

38

## 39 **INTRODUCTION**

40 Cold atmospheric plasma (CAP) is a partially or totally ionized gas including photons, electromagnetic  
41 fields, electrons, ions and neutral radicals such as reactive oxygen and nitrogen species (RONS)(1). In  
42 the past decade, this innovative technology has generated growing interest for various applications in  
43 the biomedical field such as blood coagulation, sterilization, wound healing and anti-cancer therapy(2).  
44 Number of studies have reported that CAP exerts cytotoxic effects when applied directly to cultured  
45 cells or indirectly through a plasma activated medium (PAM), as well as anti-tumoral activity(3)(4). The  
46 cytotoxic effects are mainly attributed to the production of short and long-lived RONS that generate a  
47 redox imbalance, leading to increased intracellular oxidative stress along with damage of cellular  
48 components, such as proteins, lipids and DNA(5)(6). Metabolically active cancer cells are reported to  
49 exhibit higher basal level of oxidative stress as compared to healthy cells, which could explain the  
50 reported selectivity of the anti-tumoral effects of CAP (7)(8). However, the underlying molecular

51 mechanisms of CAP tumor selectivity remain to be clarified. Additionally, most *in vivo* studies have  
52 focused on immortalized cells, which do not recapitulate the physiological complexity of epithelia,  
53 constituted of various cell types devoted to specific functions *in vivo*(7). Lastly, the impact of CAP  
54 treatment on healthy tissues that naturally have a high renewal rate has not been fully investigated.

55 The adult intestinal epithelium is one of the most rapidly self-renewing tissues in adult mammals,  
56 supported by a pool of Lgr5 intestinal stem cells (ISCs), also called crypt base columnar cells, that  
57 reconstitute the whole epithelium in less than 5 days(9). ISCs have the capacity to both self-renew and  
58 give rise to transit-amplifying cells which differentiate along the villus architecture into all the cell  
59 lineages of the epithelium, (i.e., absorptive enterocytes, mucus-producing goblet cells, hormone-  
60 secreting enteroendocrine cells, Paneth cells generating antimicrobial products, and chemosensory type  
61 2 immune response-induced tuft cells)(10). The *ex vivo* culture technology has recently been developed  
62 to indefinitely grow ISCs in a Petri dish. Upon seeding into a 3D matrix, ISCs self-renew, proliferate  
63 and differentiate into the various epithelial lineages present in the normal epithelium; *ex vivo* grown  
64 organoids maintain the *in vivo* relative proportion of each cell subtype and its temporal differentiation  
65 (11). Recently, this versatile technology has been used in the context of human colorectal(12)(13) and  
66 rectal cancer (14) allowing for the accurate prediction of drug responses(15)(16) in a personalized  
67 treatment setting.

68 In the present study, using the *ex vivo* culture system, we investigated the impact of an endoscopic  
69 helium plasma jet application on mouse ISCs at the morphological, cellular and transcriptomic levels.  
70 Moreover, we explored the potential selectivity of CAP application on tumor versus normal organoids  
71 originating from the same genetic background. Our data suggest that the *ex vivo* culture system could  
72 be a relevant alternative model to further investigate translational medical applications of CAP.

## 73 **RESULTS**

### 74 *CAP treatment affects normal growth of intestinal stem cell-derived organoid cultures*

75 To assess the potential benefits and adverse consequences of CAP treatment on normal surrounding  
76 tissues in the digestive epithelium, we set out to investigate the biological effects of plasma on mouse  
77 ISCs using the plasma jet device as described in Fig. 1a. For this purpose, we first generated mouse  
78 intestinal organoid lines from individual mice (Fig. 1b). For the experiments, fully grown organoids  
79 were mechanically dissociated and replated in a tridimensional matrix (Matrigel) supplemented with  
80 complete culture medium (Fig. 1b). Twenty-four hours after organoid replating (at day 1), CAP was  
81 directly applied to the culture plate wells. Different settings were applied, with varying durations (30 s  
82 or 60 s) and powers (30 W, 60 W or 80 W). Fresh culture medium was added 24 hours after CAP  
83 treatment (at day 2) and at day 4. At the endpoint (day 5), organoid survival and morphology of the  
84 grown elements were compared (Fig. 1c, d). Control cultures, and those treated with either helium gas  
85 alone (designated “60 s/0 W”) or mild CAP dose (60 s/30 W) followed similar organoid morphological  
86 evolution and survival rates. The spheroid-like structures (primarily constituted of proliferating ISCs  
87 during the first days of culture), started protruding as crypt-like domains and then differentiated into the  
88 various epithelial lineages present in the normal epithelium by day 5. Then, differentiated cells  
89 accumulated in the lumen of fully grown organoids (Fig. 1c, d). Conversely, exposure to moderate and  
90 higher doses of CAP (60 and 80 W, respectively) significantly reduced organoid budding capacity.  
91 Meanwhile, spheroid-like elements were overrepresented as compared to controls at day 5 (Fig. 1c, d).  
92 Moreover, under the 80 W-dose condition, dark declining structures were observed, accompanied by  
93 overall reduced survival rate tendency as compared to controls [ $34.2 \pm 1.6\%$  in CAP 60 s/80 W versus  
94 (vs)  $44.5 \pm 4.3\%$  in untreated samples, respectively, unpaired t-test  $p=0.0698$ ]. Together, these  
95 experiments indicate that direct CAP treatment alters the growth capacity of healthy ISCs in a dose-  
96 dependent manner.

97 Next, we investigated the influence of the culture medium on ISC growth at a fixed moderate dose (60  
98 s/ 50 W) (see experimental design in Fig. 2a). Direct CAP treatment was applied at day 1 and the treated  
99 culture medium was replaced with fresh medium at 30 min, 3 h or 1 day (1 d) later (Fig. 2a). The

100 morphology of grown elements was studied at day 3, an endpoint at which 61.8% of grown elements in  
101 untreated cultures showed at least one crypt-like domain (Fig. 2b, c). Removal of CAP-treated medium  
102 early after the procedure (30 min and 3 h) did not significantly alter protrusion formation. In contrast,  
103 prolonged incubation with CAP-treated culture medium (24 hours = 1 d) was associated with higher  
104 proportion of elements grown as spheroids (67%), only 9% of total elements were protruded organoids  
105 (Fig. 2b, c). Together, these data indicate that the time of exposure to reactive species generated by CAP  
106 treatment affects the capacity of ISCs to normally grow and differentiate. Interestingly, a similar  
107 negative impact on organoid budding was observed when “naïve” organoids were indirectly submitted  
108 to reactive species present in conditioned media generated either by CAP treatment applied onto another  
109 organoid culture (designated as “indirect CAP”) or the Plasma-Activated Medium alone (designated as  
110 “PAM”) (Fig. 2a-c). Exposure to Indirect CAP- or PAM-conditioned media 24 hours after the treatment  
111 (from day 2 to day 3) also altered organoid protrusion, albeit to a milder degree, thereby indicating that  
112 toxic long-lived reactive species were still present in culture supernatants after 24 hours (Supplementary  
113 Fig. 1S a-c). Taken together, these data demonstrated that normal ISCs are sensitive to direct as well as  
114 indirect CAP/PAM treatment *ex vivo*.

#### 115 *CAP treatment decreases the intestinal stem cell pool and is associated with Apoptosis*

116 To further investigate the molecular and cellular mechanisms of CAP-induced morphological effect on  
117 intestinal organoid growth, we analyzed at day 3 the whole transcriptome of organoids treated directly  
118 or indirectly with CAP at a moderate dose (50W/60 s) during a period of 24 hours (Fig. 2a). We  
119 identified 2462 differentially expressed genes in CAP-treated vs untreated cultures (False Discovery  
120 rate 0.01 and Log2-fold change of 1 or above) (Fig 2d). Of these, CAP-treatment induced  
121 downregulation of 1195 genes involved in the following biological processes: cell cycle progression,  
122 cell division and DNA replication (Fig. 2e). ISC markers like *Lgr5*, *Olfm4*, *Smoc2* and *Axin2* genes were  
123 amongst the most downregulated genes (Fig. 2d). In particular, 35% of the genes identifying the  
124 intestinal crypt base columnar stem cell signature (i. e. 135 out of 379 genes) reported by Munoz et al,  
125 (17) were downregulated in CAP-organoids (Fig. 3a, b). Loss of ISCs in CAP-treated cultures was  
126 confirmed by *in situ* hybridization experiments and immunofluorescence staining for *Olfm4*-expressing

127 cells; this correlated with significant drop in canonical Wnt signaling activity (*Axin2* used as reporter  
128 gene) (Fig. 3b-d). Consistent with suggested upregulation of the apoptotic process (p value e-49, Fig.  
129 2e), the *Pycard* gene, involved in regulation of apoptosis and adaptation to the inflammatory response,  
130 and genes associated with DNA repair (*Pclaf*, *Usp49*, *Hmga2*) were found to be downregulated  
131 meanwhile apoptosis-mediator/effector genes (*Calpains Capn2/5/12/13*, *Trp53inp2*, *Ctsl*, *Unc5b*, *Cidec*,  
132 *Atf3*, *Ddit3*, *Cfap157*) were upregulated in CAP-treated organoids (Fig. 3c, 4a). TUNEL assay  
133 performed on organoid sections confirmed the presence of DNA double strand breaks in CAP-treated  
134 cultures (Fig. 4b).

### 135 *CAP treatment induces a global response to reactive species in intestinal stem cell-derived organoids*

136 In addition, CAP induced upregulation of genes involved in modulation of intracellular signal  
137 transduction, negative regulation of response to stimulus, and response to oxygen containing compounds  
138 as well as in positive regulation of developmental processes (Fig. 2e). In line with response to CAP  
139 mediated-injury, pro-survival (*Dsg3*, *Phlda3*) and regeneration-associated genes (*Trop2/Tacstd2*, *Ptgs2*,  
140 *Hbegf*, *Ly6a/Sca1*, *Clu*, *Areg*, *Epn3*) were induced as early as 30 min post-direct CAP treatment (Fig.  
141 5a). Indeed, 34% of the genes identifying the fetal-like *Trop2* regeneration signature (50 out of the 148  
142 gene list, (18)) were upregulated in CAP-treated organoids (Fig. 5b). Accordingly, both the number of  
143 *Trop2*-expressing cells and *Areg* expression were significantly increased in CAP-treated organoids (Fig.  
144 5c, d). Furthermore, a global stress response gene expression pattern was detected with early  
145 upregulation of oxidative stress-associated transcription factors like *Fos*, *Fosb*, *Egr1*, *Nfe2l1/Nrf1*,  
146 *Nupr1*, *Nr4a1* and *Jdp2* (Fig. 5a, Supplementary Fig. 2Sa). In line with reported regulation of oxidative  
147 stress by long noncoding RNAs, expression of *Fer1l4*, *Gm20417*, *Neat1*, *Malat1*, *Gm37376* or *Kcnqlot1*  
148 was induced 30 min after CAP-treatment (Supplementary Fig. 2Sa) (19). Effectors of global response  
149 to CAP-mediated oxidative stress in organoids were found upregulated. Among these, genes encoding  
150 solute/metabolite transporters such as *Slc7a11*, a cysteine/glutamate antiporter xCT, and detoxifying  
151 enzymes (*Hmox1*, *Ethe1*, *Gch1*, *Gstk1*) were identified (Fig. 5a,d). Components of the  
152 cysteamine/cystamine metabolism (*Gpr5a*, *Vnn1*, *Chac1*, *Ggh*), involved in glutathione redox status,  
153 were also induced by the treatment (Supplementary Fig. 2Sb). Cell signaling molecules such as the Polo

154 like kinases (*Plk2*, *Plk3*) reported to exert antioxidant functions, as well as *Mapk11*, *Lif* and *Pmepal*  
155 were also upregulated by CAP application (Fig. 2Sb). Of note, the major cellular enzymatic ROS  
156 scavengers (superoxide dismutases, glutathione peroxidases, peroxiredoxins and catalase) were detected  
157 at high levels in control organoids but their expression did not substantially differ upon CAP-treatment  
158 (Table 1). *Pparg*, a master regulator of lipid metabolism and immune response (20), was also found  
159 upregulated in CAP-treated organoid cells (Fig. 5a, d). Inflammatory response genes were significantly  
160 modulated in CAP-treated organoids: interferon induced *Ifitm2/Ifitm3* and chemokine *Ccl9* were  
161 downregulated whereas expression of *Ifnlr1*, *Ilr1*, *Ddx60* and *Pdlim7* were upregulated (Fig. 2Sb).  
162 Moreover, consistent with extensive reshaping of epithelial cells, CAP application was associated with  
163 upregulation of cytoskeleton organization, cell motility and biological adhesion processes (Fig. 2e, Fig.  
164 2Sb).

165 *Apc deficient-derived organoids exhibit increased resistance to CAP treatment as compared to ISCs-*  
166 *derived organoids*

167 Since ISCs were sensitive to moderate and high doses of CAP, we sought to compare resistance of  
168 normal or tumor organoids to this treatment. For this purpose, adult *VilCreERT2-Apc<sup>fllox/fllox</sup>* or  
169 *VilCreERT2-Apc* wild-type (wt) mice were injected with tamoxifen to induce specific deletion of *Apc*  
170 exon 15 in *VilCreERT2-Apc<sup>fllox/fllox</sup>* mice, leading to loss-of-function of this tumor suppressor (designated  
171 as *Apc Δ*). *Apc* wt and *Apc Δ* intestinal crypts were isolated and cultured to generate normal and tumor  
172 organoid lines, respectively (Fig. 6 a). Efficient recombination in *Apc Δ* tumor-derived organoids was  
173 controlled at initial seeding (Supplementary Fig. 3Sa). Then, upon organoid replating, CAP was directly  
174 applied at various doses for 60 s on both kinds of organoids (Fig. 6b). As expected, at day 5, *Apc* wt  
175 organoid survival was substantially reduced at a dose of 50 W and 80 W as compared to untreated  
176 organoids (Fig. 6 b,c). Conversely, *Apc Δ* organoids demonstrated higher survival rates, regardless of  
177 the CAP dose (Fig. 6c). Dosage of reactive species in culture supernatants did not demonstrate  
178 substantial differences between organoid types at a given CAP-dose, which might have explained the  
179 observed higher resistance of *Apc Δ* vs *Apc* wt organoids (Supplementary Fig. 3Sb). To further explore  
180 the underlying molecular mechanisms, qPCR experiments were performed on samples collected at day



181 5. With the exception of *Olfm4*, expression of markers for active (*Lgr5*) and quiescent (*Hopx*) stem cell  
182 populations was maintained in tumor organoids, even at the highest CAP dose (80 W) (Fig. 6d).  
183 Regarding cell differentiation, mild CAP dose (30 W) in *Apc* wt organoids had a tendency to decrease  
184 the Paneth lineage vs the other cell types whereas *Apc*  $\Delta$ -organoids exhibited limited cell differentiation  
185 in any tested condition (Fig. 6d). Interestingly, expression of regeneration marker genes was upregulated  
186 in *Apc* wt organoids upon CAP treatment (30 W), and was detected at much higher levels in tumor  
187 organoids even under normal conditions (Fig. 7b). Moreover, tumor organoids maintained proliferation  
188 capacity and low cell death behavior following CAP treatment (Fig. 7b). Furthermore, *Apc*  $\Delta$  organoids  
189 demonstrated increased levels of genes (e. g. *Atf3*, *Nupr1*) involved in early response to reactive species  
190 as compared to *Apc* wt organoids (Fig. 7b). In addition, cellular transporters (*Slc7a11*) and detoxifying  
191 enzymes (*Hmox1*), induced in *Apc* wt organoids by mild CAP treatment, were expressed at significantly  
192 higher levels in basal conditions in tumor organoids (Fig. 7b). Differential expression of the membrane-  
193 associated aquaporins has also been proposed to contribute to CAP selectivity by facilitating influx of  
194 water and hydrogen peroxide into cancer cells(21). In ISCs and healthy intestinal organoids, RNAseq  
195 data showed that *Aqp1*, *Aqp4* and *Aqp11* were the most significantly expressed (Supplementary Fig  
196 S3c). CAP treatment particularly reduced *Aqp1* and *Aqp4* levels in *Apc* wt organoids (Supplementary  
197 Fig S3c). Interestingly, irrespective of CAP treatment, tumor organoids were expressing 2-fold less  
198 *Aqp1*, *Aqp4* and 10-fold less *Aqp3* levels than normal organoids, whereas *Aqp5* expression was  
199 increased (Supplementary Fig S3d). Taken together, these experiments indicate that tumor-like  
200 organoids deficient for the tumor suppressor *Apc* demonstrate a higher potential to resist CAP-induced  
201 injury as compared to ISC-derived organoids. Such behavior could be, in part, explained by the  
202 expression of an oxidative stress resistance program, already active under basal conditions, and reduced  
203 cell surface expression of aquaporins.



## 204 **DISCUSSION**

205 In the present study, we addressed the relevance of a 3D organoid culture to investigate the biological  
206 effects of CAP on normal epithelial stem cells and tumor cells isolated from the mouse small intestine.  
207 First of all, we studied the parameters that determine CAP effects on cells and found that helium, used  
208 as the carrier gas, did not by itself alter organoid growth. We observed toxic effect of direct CAP  
209 application to ISC cultures, showing dose-dependency as reported on various cancer lines (21). To  
210 determine whether CAP treatment can induce a “bystander effect” as described in radiobiology, in which  
211 irradiated cells communicate stress via extracellular signaling to neighboring cells, we also analyzed  
212 indirect application of CAP on organoids (Indirect CAP and PAM). In our experimental setting,  
213 organoid growth was similarly affected by the three conditions, indicating that the main effect of CAP  
214 was mediated by reactive species delivered in the culture medium, with minor contribution of cellular  
215 components potentially released from the CAP-treated organoids. Our data also suggest that CAP-  
216 mediated cytotoxicity depends in part on long-lived reactive species (typically nitrites, hydrogen  
217 peroxide, ozone) since increased levels of nitrites were still detected 24 hours after CAP treatment as  
218 compared to controls (Supplementary Fig S3b). On the other hand, it is known that the nature of CAP-  
219 generated RONS is conditioned by the composition of the cell culture medium(22). Organoid growth  
220 requires a complex medium, including several antioxidant supplements such as N-acetyl cysteine,  
221 glutathione, sodium pyruvate and ascorbic acid (23) (24)(25) (26). We hypothesize that the presence of  
222 such antioxidants in the medium might have increased the threshold level needed to detect variations in  
223 the long-lived ROS species with the DCFH-DA probe (Supplementary Fig S3b).

224 Moderate (50/60 W) to high (80 W) doses of CAP severely impacted ISC self-renewal and  
225 differentiation. Although ISCs express important levels of ROS scavenger enzymes (Supplementary  
226 Fig. S3e), previous studies have also reported that, under steady-state conditions, ISCs exhibit two-fold  
227 increased levels of ROS as compared to the rest of the epithelium(27). Together, these data are in line  
228 with the hypothesis that the application of moderate-to-high CAP doses to ISCs reaches a redox status  
229 threshold above which toxic accumulation of RONS occurs, similar to what has been previously  
230 described for cancer cell lines(7)(8); this ultimately induces DNA damage and cell death by apoptosis.

231 Interestingly, moderate CAP dose also elicited an epithelial response with hallmarks of tissue  
232 regeneration, characterized by re-expression of a fetal signature, reported to be induced by a variety of  
233 insults in the gastrointestinal tract(18)(28)(29)(30). As part of this fetal reprogramming, upregulation of  
234 genes coding for factors mainly released by the surrounding stromal compartment (Areg, Ptgs2, etc..),  
235 were upregulated in epithelial cells *ex vivo*. This suggests that, upon injury, the epithelium has the  
236 intrinsic potential to contribute to the repair process. In the same line, CAP treatment on murine  
237 cementoblasts has been reported to induce a regeneration process similar to that elicited by enamel  
238 matrix derivatives *in vivo*(31). Moreover, CAP treatment induced a global response to oxidative stress  
239 in organoids that involved upregulation of RONS-associated transcription factors and effectors known  
240 to regulate intracellular ROS balance and reported to be activated upon CAP treatment(32)(33)(34)(35).

241 A major observation of our study relates to CAP application effects on tumoral APC-deficient organoids.  
242 The potential of CAP treatment in oncology relies on a proposed selective targeting of cancer cells over  
243 healthy cells due to higher intracellular levels of ROS in malignant cells (36). However, compared  
244 sensitivity of CAP needs to be performed on the same cell type and genetic background, with cells  
245 growing under the same culture conditions. This was addressed in the present study by comparing the  
246 impact of CAP application on normal “healthy” organoids and tumoral Apc-deficient organoids, the  
247 latter being used as a colorectal cancer (CRC) model. Contrary to our initial expectations, tumor  
248 organoids exhibited higher resistance to CAP treatment than healthy organoids. Such results could be  
249 explained, at least in part, by the fact that Apc-deficient organoids exhibited a much higher antioxidant  
250 response at baseline than ISC-derived organoids. The potential contribution of differential expression  
251 of aquaporins to CAP selectivity could be interesting to address in future *ex vivo* studies.

252 In summary, the present study reveals the potential of organoid technology to further investigate the  
253 biological effects of CAP on normal and tumoral tissues. Indeed, organoid cultures faithfully reflect cell  
254 heterogeneity in epithelial tissues, they are as amenable to “Omics” studies as the cancer cell lines and,  
255 from a translational point of view, they can be used to compare various CAP application settings. Our  
256 study highlights the importance of considering CAP toxicity on metabolically active resident stem cells  
257 in tissues, like the intestine, undergoing permanent self-renewal, in order to adjust the dose of treatment.

258 Furthermore, CRC development is known to be a multistep process. Following the initial hit mutation  
259 in the Apc gene that leads to Wnt signaling overactivation, mutations deregulating other pathways (such  
260 as KRAS/TGFb and p53) sequentially accumulate in cancer cells, and correlate with cancer  
261 progression(37)(38). Future studies will be needed to investigate the sensitivity of CAP treatment on  
262 tumor organoids bearing the aforementioned additional mutations in order to definitely elucidate the  
263 potential of CAP for personalized anti-cancer therapy.

## 264 MATERIALS AND METHODS

### 265 *Experimental animals*

266 Adult mice were from the outbred CD1 strain (Charles River Laboratories). To obtain tumor-derived  
267 organoids, we crossed Tg(Vil1-cre/ERT2)<sup>23Syr/J</sup> (39) and Apc<sup>tm1Tyj/J</sup> designated Apc<sup>flox</sup> (40). Adult Vil-  
268 cre/ERT2/Apc<sup>wt/wt</sup> and Vil-cre/ERT2/Apc<sup>flox/flox</sup> were injected intraperitoneally for 3 consecutive days  
269 with tamoxifen (2 mg per 30 g of body weight) to induce recombination in the Apc locus and the small  
270 intestine was harvested 2-3 days after the last injection. Tamoxifen was dissolved in a sunflower  
271 oil/ethanol mixture (9:1) at 10 mg/ml (both products from Sigma-Aldrich).

### 272 *Ex vivo culture*

273 To generate intestinal organoids, mouse adult small intestine was dissociated with 5 mM EDTA-in  
274 DPBS (Gibco) according to the protocol reported in(41). Briefly, the culture medium consisted of  
275 Advanced-DMEM/F12 medium supplemented with 2 mM L-glutamine, N2 and B27 w/o vit.A,  
276 gentamycin, penicillin-streptomycin cocktail, 10 mM HEPES (all from Invitrogen), 1 mM N acetyl  
277 cysteine (Sigma-Aldrich), 50 ng/ml EGF and 100 ng/ml Noggin (both from Peprotech), and 100 ng/ml  
278 CHO-derived mouse R-spondin 1 (R&D System). Culture medium was changed every other day and  
279 after 5-6 days in culture, organoids were harvested, mechanically dissociated and replated in fresh  
280 Matrigel matrix (catalog 356235 from BD Biosciences). Culture media were supplemented with 10 μM  
281 Y-27632 (Sigma Aldrich) in all initial seeding and replating experiments for the first two days. Pictures  
282 were acquired with a Moticam Pro camera connected to Motic AE31 microscope.

### 283 *Cold atmospheric plasma treatment*

284 The cold plasma source was an endoscopic plasma jet allowing for the generation and transport of CAP  
285 over long distances as described in our previous work(42). It consists of a tubular DBD chamber made  
286 of quartz supplied with helium gas and surrounded by a high-voltage electrode. The power-control  
287 source was an AFS (G10S-V) generator, delivering an 18 kHz sinusoidal signal. The discharge chamber  
288 was plugged into a polytetrafluoroethylene (PTFE) tube (outer diameter 3 mm, wall thickness 0.75 mm)  
289 transporting the plasma post-discharge over > 2 meters. An electrically floating copper wire (diameter  
290 0.2 mm) was inserted partially into the dielectric chamber and extended almost until the end of the PTFE

291 tube (5 mm before its end) to allow the maintenance of active plasma for several meters and to sustain  
292 a plasma plume at the outlet for potential endoscopic treatment. Treatment was performed under a  
293 laminar flow hood using a 1.6 lpm helium flow; thus RONS were created by the mixing of CAP with  
294 ambient air (42). The power values (0, 30, 50, 60 or 80 W) were set on the AFS-generator. The catheter  
295 was placed vertically in a designated test bench. The tip of the catheter was placed at 3 cm from the top  
296 of the 12-well plate containing the media to be treated, i.e. the length of the plasma plume. This allowed  
297 plasma-generated RONS to reach the medium without the plasma plume touching it, avoiding any  
298 electrical connection that would have increased current and RONS creation in a less controlled manner.  
299 Fully-grown organoid cultures were dissociated by mechanical pipetting and replated on Matrigel in 12-  
300 well plates (VWR, Belgium). Twenty-four hours later, CAP was applied vertically on organoid cultures  
301 at room temperature. Each well was placed successively under the plasma plume for 30 s or 60 s. During  
302 treatment, the other wells were protected by a designated cover plate to avoid unwanted RONS diffusion  
303 to neighboring wells. Following exposure to CAP, treated samples were placed back at 37 °C in a 5%  
304 CO<sub>2</sub> incubator (Binder C150) and the medium was changed as indicated in the results section and  
305 different endpoints were applied.

#### 306 *Tissue processing and immunohistochemical analysis*

307 Organoid culture samples were fixed with 10% formalin solution, neutral buffered (Sigma-Aldrich) for  
308 20 minutes at room temperature then sedimented through 30% sucrose solution before OCT embedding.  
309 Histological protocols as well as immuno-fluorescence/histochemistry experiments on 6 µm sections  
310 were carried out as previously described (43). Table 2 lists primary antibodies, TUNEL assay kit and  
311 DAPI used. Stained samples were visualized with a DMI600B epifluorescence microscope equipped  
312 with a DFC365FX camera (Leica). The number of independent organoid cultures obtained from  
313 individual adult mice used for each experiment is reported in Figures and in Figure legends.

#### 314 *Gene expression analysis*

315 qRT-PCR was performed on total RNA extracted from organoid cultures as reported(44). Expression  
316 levels of target genes were normalized to that of reference genes (Rpl13, Ywhaz). Table 2 lists the  
317 primers used for qPCR studies. *In situ* hybridization experiments were performed according to

318 manufacturer instructions with the RNAscope kit (ACD-Biotechne) (probes listed in Table 2). Stained  
319 samples were visualized with a Nanozoomer digital scanner (Hamamatsu).

#### 320 *RNA seq and Gene Set Enrichment Analysis (GSEA)*

321 RNA quality was checked using a Bioanalyzer 2100 (Agilent technologies). Indexed cDNA libraries  
322 were obtained using the Ovation Solo (NuGen) or the NEBNext RNA-Seq Systems following  
323 manufacturer recommendations. The multiplexed libraries were loaded onto a NovaSeq 6000 (Illumina)  
324 using an S2 flow cell and sequences were produced using a 200 Cycle Kit. Paired-end reads were  
325 mapped against the mouse reference genome GRCm38 using STAR software to generate read  
326 alignments for each sample. Annotations Mus\_musculus.GRCm38.90.gtf were obtained from  
327 ftp.Ensembl.org. After transcripts assembling, gene level counts were obtained using HTSeq.  
328 Differentially expressed genes were identified with EdgeR method and further analyzed using GSEA  
329 MolSig (Broad Institute)(45). Heatmaps were generated using Heatmapper(46) and common signature  
330 genes were identified using Venny 2.0 (47).

#### 331 *Detection of reactive species*

332 Detection of reactive species was performed in organoid culture supernatants 24 hours after CAP  
333 treatment, as described in (22). Nitrite concentration was measured using a colorimetric assay with the  
334 Griess reagent. Absorbance was determined at 570 nm using the iMark Microplate reader (BioRad).  
335 Global ROS were detected using the reporter 2',7'-dichlorodihydrofluorescein diacetate (DCFH-DA,  
336 D6883 Sigma-Aldrich). The emitted fluorescence of oxidized DFC was detected at 528 nm using the  
337 Microwin software on Mithras LB940 reader (Berthold technologies).

#### 338 *Statistical analysis*

339 Statistical analyses were performed with Graph Pad Prism 5. All experimental data are expressed as  
340 mean  $\pm$  s.e.m unless indicated in Figure legends. The significance of differences between groups was  
341 determined by appropriate parametric or non-parametric tests as described in the text or Figure legends.

#### 342 *Data availability statement*

343 The datasets generated and analyzed during the current study are available in the GEODATASET  
344 repository [GEO Accession GSE 178148]. Some datasets analyzed during this study were included in a  
345 published article(48) and are available in the GEODATASET repository [GSE 135362].

346



347 **REFERENCES**

- 348 1. Yan D, Sherman JH, Keidar M. Cold atmospheric plasma, a novel promising anti-cancer  
349 treatment modality. Vol. 8, *Oncotarget*. Impact Journals LLC; 2017. p. 15977–95.
- 350 2. Laroussi M. Cold Plasma in Medicine and Healthcare: The New Frontier in Low Temperature  
351 Plasma Applications. *Front Phys* [Internet]. 2020 Mar 20 [cited 2021 Oct 8];8:74. Available  
352 from: <https://www.frontiersin.org/article/10.3389/fphy.2020.00074/full>
- 353 3. Dubuc A, Monsarrat P, Virard F, Merbahi N, Sarrette JP, Laurencin-Dalieux S, et al. Use of  
354 cold-atmospheric plasma in oncology: a concise systematic review. Vol. 10, *Therapeutic  
355 Advances in Medical Oncology*. SAGE Publications Inc.; 2018.
- 356 4. Nakamura K, Peng Y, Utsumi F, Tanaka H, Mizuno M, Toyokuni S, et al. Novel  
357 Intraperitoneal Treatment With Non-Thermal Plasma-Activated Medium Inhibits Metastatic  
358 Potential of Ovarian Cancer Cells. *Sci Rep*. 2017 Dec 1;7(1).
- 359 5. Vandamme M, Robert E, Lerondel S, Sarron V, Ries D, Dozias S, et al. ROS implication in a  
360 new antitumor strategy based on non-thermal plasma. *Int J Cancer*. 2012 May 1;130(9):2185–  
361 94.
- 362 6. Sun Y, Lu Y, Saredy J, Wang X, Drummer IV C, Shao Y, et al. ROS systems are a new  
363 integrated network for sensing homeostasis and alarming stresses in organelle metabolic  
364 processes. Vol. 37, *Redox Biology*. Elsevier B.V.; 2020.
- 365 7. Bekeschus S, Liebelt G, Menz J, Berner J, Sagwal SK, Wende K, et al. Tumor cell metabolism  
366 correlates with resistance to gas plasma treatment: The evaluation of three dogmas. *Free Radic  
367 Biol Med*. 2021 May 1;167:12–28.
- 368 8. Perillo B, Di Donato M, Pezone A, Di Zazzo E, Giovannelli P, Galasso G, et al. ROS in cancer  
369 therapy: the bright side of the moon. Vol. 52, *Experimental and Molecular Medicine*. Springer  
370 Nature; 2020. p. 192–203.
- 371 9. Barker N, Van Es JH, Kuipers J, Kujala P, Van Den Born M, Cozijnsen M, et al. Identification  
372 of stem cells in small intestine and colon by marker gene *Lgr5*. *Nature*. 2007 Oct  
373 25;449(7165):1003–7.
- 374 10. Sprangers J, Zaalberg IC, Maurice MM. Organoid-based modeling of intestinal development,

- 375 regeneration, and repair. Vol. 28, Cell Death and Differentiation. Springer Nature; 2021. p. 95–  
376 107.
- 377 11. Sato T, Vries RG, Snippert HJ, Van De Wetering M, Barker N, Stange DE, et al. Single Lgr5  
378 stem cells build crypt-villus structures in vitro without a mesenchymal niche. Nature. 2009  
379 May 14;459(7244):262–5.
- 380 12. Van De Wetering M, Francies HE, Francis JM, Bounova G, Iorio F, Pronk A, et al. Prospective  
381 derivation of a living organoid biobank of colorectal cancer patients. Cell. 2015 May  
382 7;161(4):933–45.
- 383 13. Roerink SF, Sasaki N, Lee-Six H, Young MD, Alexandrov LB, Behjati S, et al. Intra-tumour  
384 diversification in colorectal cancer at the single-cell level. Nature. 2018 Apr  
385 26;556(7702):437–62.
- 386 14. Yao Y, Xu X, Yang L, Zhu J, Wan J, Shen L, et al. Patient-Derived Organoids Predict  
387 Chemoradiation Responses of Locally Advanced Rectal Cancer. Cell Stem Cell. 2020 Jan  
388 2;26(1):17-26.e6.
- 389 15. Tuveson D, Clevers H. Cancer modeling meets human organoid technology. Vol. 364, Science.  
390 American Association for the Advancement of Science; 2019. p. 952–5.
- 391 16. Driehuis E, Kretzschmar K, Clevers H. Establishment of patient-derived cancer organoids for  
392 drug-screening applications. Nat Protoc. 2020 Oct 1;15(10):3380–409.
- 393 17. Muñoz J, Stange DE, Schepers AG, Van De Wetering M, Koo BK, Itzkovitz S, et al. The Lgr5  
394 intestinal stem cell signature: Robust expression of proposed quiescent ' +4' cell markers.  
395 EMBO J. 2012 Jul 18;31(14):3079–91.
- 396 18. Fernandez Vallone V, Leprovots M, Strollo S, Vasile G, Lefort A, Libert F, et al. Trop2 marks  
397 transient gastric fetal epithelium and adult regenerating cells after epithelial damage.  
398 Development [Internet]. 2016 May 1 [cited 2019 Sep 10];143(9):1452–63. Available from:  
399 <http://dev.biologists.org/lookup/doi/10.1242/dev.131490>
- 400 19. Ghafouri-Fard S, Shoorei H, Taheri M. Non-coding RNAs are involved in the response to  
401 oxidative stress. Vol. 127, Biomedicine and Pharmacotherapy. Elsevier Masson SAS; 2020.
- 402 20. Korbecki J, Bobiński R, Dutka M. Self-regulation of the inflammatory response by peroxisome

- 403 proliferator-activated receptors. Vol. 68, Inflammation Research. Birkhauser Verlag AG; 2019.
- 404 21. Yan D, Talbot A, Nourmohammadi N, Cheng X, Canady J, Sherman J, et al. Principles of  
405 using Cold Atmospheric Plasma Stimulated Media for Cancer Treatment. *Sci Rep.* 2015 Dec  
406 17;5.
- 407 22. Tornin J, Labay C, Tampieri F, Ginebra MP, Canal C. Evaluation of the effects of cold  
408 atmospheric plasma and plasma-treated liquids in cancer cell cultures. Vol. 16, *Nature*  
409 *Protocols.* Nature Research; 2021. p. 2826–50.
- 410 23. Guarino VA, Oldham WM, Loscalzo J, Zhang YY. Reaction rate of pyruvate and hydrogen  
411 peroxide: assessing antioxidant capacity of pyruvate under biological conditions. *Sci Rep.* 2019  
412 Dec 1;9(1).
- 413 24. Yang X, Chen G, Yu KN, Yang M, Peng S, Ma J, et al. Cold atmospheric plasma induces  
414 GSDME-dependent pyroptotic signaling pathway via ROS generation in tumor cells. *Cell*  
415 *Death Dis.* 2020 Apr 1;11(4).
- 416 25. Nishi K, Iwaihara Y, Tsunoda T, Doi K, Sakata T, Shirasawa S, et al. ROS-induced cleavage of  
417 NHLRC2 by caspase-8 leads to apoptotic cell death in the HCT116 human colon cancer cell  
418 line article. *Cell Death Dis.* 2017 Dec 1;8(12).
- 419 26. Beyer RE. The role of ascorbate in antioxidant protection of biomembranes: Interaction with  
420 vitamin E and coenzyme Q. *J Bioenerg Biomembr.* 1994 Aug;26(4):349–58.
- 421 27. Yui S, Azzolin L, Maimets M, Pedersen MT, Fordham RP, Hansen SL, et al. YAP/TAZ-  
422 Dependent Reprogramming of Colonic Epithelium Links ECM Remodeling to Tissue  
423 Regeneration. *Cell Stem Cell.* 2018 Jan 4;22(1):35-49.e7.
- 424 28. Ayyaz A, Kumar S, Sangiorgi B, Ghoshal B, Gosio J, Ouladan S, et al. Single-cell  
425 transcriptomes of the regenerating intestine reveal a revival stem cell. *Nature* [Internet]. 2019;  
426 Available from: <http://dx.doi.org/10.1038/s41586-019-1154-y>
- 427 29. Nusse YM, Savage AK, Marangoni P, Rosendahl-Huber AKM, Landman TA, De Sauvage FJ,  
428 et al. Parasitic helminths induce fetal-like reversion in the intestinal stem cell niche. *Nature.*  
429 2018 Jul 5;559(7712):109–13.
- 430 30. Wang Y, Chiang IL, Ohara TE, Fujii S, Cheng J, Muegge BD, et al. Long-Term Culture

- 431 Captures Injury-Repair Cycles of Colonic Stem Cells. *Cell* [Internet]. 2019;179(5):1144-  
432 1159.e15. Available from: <https://doi.org/10.1016/j.cell.2019.10.015>
- 433 31. Eggers B, Marciniak J, Deschner J, Stope MB, Mustea A, Kramer FJ, et al. Cold atmospheric  
434 plasma promotes regeneration-associated cell functions of murine cementoblasts in vitro. *Int J*  
435 *Mol Sci*. 2021 May 2;22(10).
- 436 32. Kwong M, Kan YW, Chan JY. The CNC basic leucine zipper factor, Nrf1, is essential for cell  
437 survival in response to oxidative stress-inducing agents. Role for Nrf1 in  $\gamma$ -gcs(L) and gss  
438 expression in mouse fibroblasts. *J Biol Chem*. 1999 Dec 24;274(52):37491–8.
- 439 33. Tanigawa S, Lee CH, Lin CS, Ku CC, Hasegawa H, Qin S, et al. Jun dimerization protein 2 is a  
440 critical component of the Nrf2/MafK complex regulating the response to ROS homeostasis.  
441 *Cell Death Dis*. 2013;4(11).
- 442 34. Tabuchi Y, Uchiyama H, Zhao QL, Yunoki T, Andocs G, Nojima N, et al. Effects of nitrogen  
443 on the apoptosis of and changes in gene expression in human lymphoma U937 cells exposed to  
444 argon-based cold atmospheric pressure plasma. *Int J Mol Med*. 2016 Jun 1;37(6):1706–14.
- 445 35. Kou L, Jiang X, Huang H, Lin X, Zhang Y, Yao Q, et al. The role of transporters in cancer  
446 redox homeostasis and cross-talk with nanomedicines. Vol. 15, *Asian Journal of*  
447 *Pharmaceutical Sciences*. Shenyang Pharmaceutical University; 2020. p. 145–57.
- 448 36. Semmler ML, Bekeschus S, Schäfer M, Bernhardt T, Fischer T, Witzke K, et al. Molecular  
449 mechanisms of the efficacy of cold atmospheric pressure plasma (CAP) in cancer treatment  
450 [Internet]. Vol. 12, *Cancers*. MDPI AG; 2020 [cited 2020 Feb 21]. Available from:  
451 <http://www.ncbi.nlm.nih.gov/pubmed/31979114>
- 452 37. Fodde R. The APC gene in colorectal cancer. *Eur J Cancer*. 2002;38(7):867–71.
- 453 38. Malki A, Elruz RA, Gupta I, Allouch A, Vranic S, Al Moustafa AE. Molecular mechanisms of  
454 colon cancer progression and metastasis: Recent insights and advancements. Vol. 22,  
455 *International Journal of Molecular Sciences*. MDPI AG; 2021. p. 1–24.
- 456 39. El Marjou F, Janssen KP, Chang BHJ, Li M, Hindie V, Chan L, et al. Tissue-specific and  
457 inducible Cre-mediated recombination in the gut epithelium. *Genesis*. 2004 Jul;39(3):186–93.
- 458 40. Robanus-Maandag EC, Koelink PJ, Breukel C, Salvatori DCF, Jagmohan-Changur SC, Bosch

- 459 CAJ, et al. A new conditional Apc-mutant mouse model for colorectal cancer. *Carcinogenesis*.  
460 2010 Feb 22;31(5):946–52.
- 461 41. Vallone V, Leprovots M, Vassart G, Garcia M-I. Ex vivo Culture of Fetal Mouse Gastric  
462 Epithelial Progenitors. *BIO-PROTOCOL*. 2017;7(1).
- 463 42. Bastin O, Thulliez M, Servais J, Nonclercq A, Delchambre A, Hadeff A, et al. Optical and  
464 electrical characteristics of an endoscopic DBD plasma jet. *Plasma Med*. 2020;10(2):71–90.
- 465 43. Garcia MI, Ghiani M, Lefort A, Libert F, Strollo S, Vassart G. LGR5 deficiency deregulates  
466 Wnt signaling and leads to precocious Paneth cell differentiation in the fetal intestine. *Dev*  
467 *Biol*. 2009 Jul 1;331(1):58–67.
- 468 44. Mustata RC, Van Loy T, Lefort A, Libert F, Strollo S, Vassart G, et al. Lgr4 is required for  
469 Paneth cell differentiation and maintenance of intestinal stem cells ex vivo. *EMBO Rep*.  
470 2011;12(6):558–64.
- 471 45. Subramanian A, Tamayo P, Mootha VK, Mukherjee S, Ebert BL, Gillette MA, et al. Gene set  
472 enrichment analysis: A knowledge-based approach for interpreting genome-wide expression  
473 profiles. *Proc Natl Acad Sci U S A*. 2005 Oct 25;102(43):15545–50.
- 474 46. Babicki S, Arndt D, Marcu A, Liang Y, Grant JR, Maciejewski A, et al. Heatmapper: web-  
475 enabled heat mapping for all. *Nucleic Acids Res*. 2016 Jul 8;44(W1):W147–53.
- 476 47. Oliveros JC (2007-2015). Venny 2.1.0 [Internet]. An interactive tool for comparing lists with  
477 Venn’s diagrams. [cited 2021 Sep 25]. Available from:  
478 <https://bioinfogp.cnb.csic.es/tools/venny/index.html>
- 479 48. Fernandez Vallone V, Leprovots M, Ribatallada-Soriano D, Gerbier R, Lefort A, Libert F, et  
480 al. LGR 5 controls extracellular matrix production by stem cells in the developing intestine .  
481 *EMBO Rep*. 2020 Jul 3;21(7).
- 482
- 483
- 484
- 485

486 **ACKNOWLEDGMENTS**

487 We are grateful to Sylvie Robine for providing the Vill1-cre/ERT2<sup>23Syr/J</sup> mouse strain. We acknowledge  
488 the contribution of a medical writer, Sandy Field, PhD, for English language editing of this manuscript.

489 **CONFLICT OF INTEREST STATEMENT**

490 The authors have nothing to disclose.

491 **AUTHOR CONTRIBUTION STATEMENT**

492 AH, ML, OB, MT: study concept and design, acquisition of data, analysis and interpretation of data,  
493 statistical analysis, drafting of the ms

494 JD, AN, AD, FR: study concept and design, study supervision, critical revision of the ms, obtained  
495 funding

496 MIG: study concept and design, acquisition of data, analysis and interpretation of data, drafting of the  
497 ms, study supervision, obtained funding.

498 **ETHIC STATEMENTS**

499 Animal procedures complied with the guidelines of the European Union and were approved by the local  
500 ethics committee CEBEA from Erasme-Faculty of Medicine under the accepted protocol 713N.

501 **FUNDING STATEMENTS**

502 This work was supported by the "Actions de recherche concertées" (ARC, Collective Research  
503 Initiatives), the non-for-profit Association Recherche Biomédicale et Diagnostic (ARBD), and the  
504 Fondation Michel Cremer.

505 **FIGURE LEGENDS**

506 **Figure 1. CAP treatment affects normal growth of intestinal stem cell-derived organoid cultures.**

507 **a.** The CAP system allows for generation of a helium CAP that can be transported over long distances  
508 for applications in endoscopy. **b.** Direct CAP treatment on organoid cultures generated from small  
509 intestine isolated crypts. **c.** Representative pictures of a given field showing growth of CAP-treated or  
510 untreated organoids at day 1 (before CAP application) and day 5 (endpoint). Survival rate (%) at day 5  
511 vs day 1, indicated below the images, is expressed as the mean  $\pm$  SEM (n=4 organoid lines generated  
512 from different mice). Curved and straight arrows show fully protruded organoid and spheroid,  
513 respectively. Arrowheads indicate declining organoids. Scale bars: 500  $\mu$ m. **d.** Quantification of  
514 organoid complexity at day 5. Representative element categories (Spheroids and Organoids) are defined  
515 morphologically on the right. An average number of 195 elements was analyzed per condition per  
516 organoid line (n= 3 organoid lines). Data are represented as means  $\pm$  sem. Two-way ANOVA:  
517 interaction \*\*\*\* P< 0.0001 followed by Tukey's multiple comparisons test: a: compared to Untreated  
518 conditions, b: compared to 60 s/ 0 W conditions \*\*P< 0.01; \*\*\*P< 0.001; \*\*\*\*P< 0.0001.

519 **Figure 2. Impact of the CAP application method on organoid morphology and global gene**

520 **expression. a.** CAP treatment (50 W/60 s) was applied directly to organoid cultures at day 1 (post-  
521 replating) for 30 minutes, 3 hours or 24 hours. Then fresh medium was provided until day 3 (endpoint).  
522 Alternatively, naïve organoids were cultured at day 1 for 24 hours with freshly-generated CAP-  
523 conditioned media (Indirect CAP) or plasma-activated media (PAM). At day 2 (post-replating), fresh  
524 culture medium was provided for a further 24 hours until day 3 (endpoint). **b.** Representative pictures  
525 of a given field showing organoid growth at day 1 (before CAP application) and day 3. Arrowheads and  
526 triangles show individual elements evolving as protruded organoids and spheroids, respectively.  
527 Asterisks indicate dying elements. Scale bars: 500  $\mu$ m. **c.** Quantification of organoid complexity at day  
528 3. An average number of 100 elements was analyzed per condition per organoid line (n= 4 organoid  
529 lines). Data are represented as means  $\pm$  sem. Two-way ANOVA: interaction \*\*\*\* P< 0.0001 followed  
530 by Tukey's multiple comparisons test: a, d: \*\*\*\*P< 0.0001, b: \*\*\*P< 0.001, c: \*P< 0.05. (all compared  
531 to untreated). Time of exposure to CAP treatment is indicated (30', 3 h, 1 day) ID: Indirect CAP. **d.**



532 Heatmap of differentially regulated genes in CAP-treated vs Untreated (Controls) organoids. Samples  
533 were treated with CAP directly (Direct), for 30 min (30') or 24 hours between day 1 and day 2 (1 d);  
534 indirectly (Indirect) or with PAM for 24 hours between day 1 and day 2 (1 d) or between day 2 and day  
535 3 (2 d). Some of the most-modulated genes are indicated on the right side. **e.** GSEA-Biological processes  
536 for upregulated and downregulated gene lists in CAP-treated vs untreated Controls.

537 **Figure 3. CAP treatment decreases the intestinal stem cell pool. a.** Venn diagram showing that part  
538 of the downregulated gene list in CAP-treated samples vs controls (135 out of 1195 genes) corresponds  
539 to the ISC (Intestinal Stem Cell)-associated signature. **b.** Expression levels of some genes of the ISC-  
540 associated signature commonly downregulated in CAP-treated organoids vs Untreated controls.  
541 CP20M: counts per kilobase of transcript per 20 million mapped reads. Data are represented as means  
542  $\pm$  sd. n = 4 and 3 samples in Controls and CAP-treated conditions, respectively. **c.** Expression of *Lgr5*,  
543 *Axin2*, and *Pycard* genes detected in organoids by RNAscope at day 3. **d.** Immunofluorescence showing  
544 *Olfm4*-expressing cells in organoids at day 3 (red arrows). Cell membranes shown with  $\beta$ -catenin and  
545 nuclei counterstained with DAPI. Right panel: Expression levels of *Olfm4* in the various conditions  
546 reported in CP20M. Scale bars: 50  $\mu$ m (panels c and d).

547 **Figure 4. CAP treatment of organoids is associated with Apoptosis. a.** Expression levels of DNA  
548 repair and apoptosis-related genes in the various conditions reported in CP20M. Data are represented as  
549 means  $\pm$  sd. n = 4 and 3 samples in Controls and CAP-treated conditions, respectively. **b.** Organoid  
550 sections were stained with TUNEL for apoptotic cells (visualized by pink asterisks). Cell membranes  
551 are shown with  $\beta$ -catenin and nuclei were counterstained with DAPI. Scale bars: 50  $\mu$ m.

552 **Figure 5. CAP treatment induces a global response to reactive species in intestinal stem cell-**  
553 **derived organoids. a.** Expression levels of Pro-survival, regeneration and oxidative stress-associated  
554 genes in the various conditions reported in CP20M. Data are represented as means  $\pm$  sd. n = 4 and 3  
555 samples in Controls and CAP-treated conditions, respectively. **b.** Venn diagram showing that part of the  
556 upregulated gene list in CAP-treated vs control organoids (50 out of 1267 genes) corresponds to the  
557 Trop-2-associated regeneration signature. **c.** Immunofluorescence showing Trop2-expressing cells  
558 (visualized by green asterisks) in organoids at day 3. Cell membranes shown with  $\beta$ -catenin and nuclei

559 counterstained with DAPI. **d.** Expression of *Areg*, *Pparg*, and *Hmox1* genes detected in organoids by  
560 RNAscope at day 3. Scale bars: 50  $\mu$ m (panels c and d).

561 **Figure 6. Apc deficient-derived organoids exhibit increased resistance to CAP treatment as**  
562 **compared to normal ISC-derived organoids. a.** CAP treatment was applied directly to Apc wt or Apc  
563  $\Delta$  (Apc-deficient) organoid cultures at day 1 post-replating for 24 hours. Fresh medium was added at  
564 days 2 and 4. **b.** Representative pictures of a given organoid type (Apc wt or Apc  $\Delta$ ) at day 5 following  
565 CAP treatment at the indicated doses. Scale bars: 500  $\mu$ m. **c.** Left panel: organoid survival rate (in %).  
566 An average number of 120 elements was studied over time per condition per organoid line (n= 6 Apc  
567 wt and 5 Apc  $\Delta$  organoid lines, respectively). Data are represented as means  $\pm$  sem. Two-way ANOVA:  
568 CAP dose \*\*\*/Genotype \*\*\*\* P < 0.0001 followed by Sidak's multiple comparisons test: a, \*\*\*P <  
569 0.001; b, \*\*\*P < 0.01; c, \*P < 0.05; ns: not significant (all compared to Apc wt-0 W), Right panel:  
570 quantification of total RNA extracted/sample at day 5. Each symbol corresponds to a given organoid  
571 line. Two-way ANOVA: CAP dose \* P < 0.05/Genotype \*\*\*\* P < 0.0001 followed by Sidak's multiple  
572 comparisons test: a, \*\*\*\*P < 0.0001; b, \*P < 0.05; c, \*\*P < 0.01. (all compared to Apc wt-0 W). **d.** Gene  
573 expression analysis by qRT-PCR of the indicated stem cell and differentiation markers. Each symbol  
574 corresponds to a given organoid line. Values are normalized to Untreated Apc wt levels. Data are  
575 represented as means  $\pm$  sem. One-way Anova test. \*\*\*\* P < 0.0001; \*\*\*\* P < 0.001; \*\*P < 0.01; \*P <  
576 0.05; ns: not significant.

577 **Figure 7. Apc deficient-derived organoids exhibit increased resistance to CAP treatment as**  
578 **compared to normal intestinal stem cell-derived organoids. a.** Design of the experiment. See Figure  
579 Legend Fig. 6a. **b.** Gene expression analysis by qRT-PCR of the indicated markers involved in  
580 regeneration, cell growth/apoptosis and response to stress. Each symbol corresponds to a given organoid  
581 line. Values are normalized to Untreated Apc wt levels. Data are represented as means  $\pm$  sem. One-way  
582 Anova test. \*\*\*\* P < 0.0001; \*\*\*\* P < 0.001; \*\*P < 0.01; P < 0.05; ns: not significant.

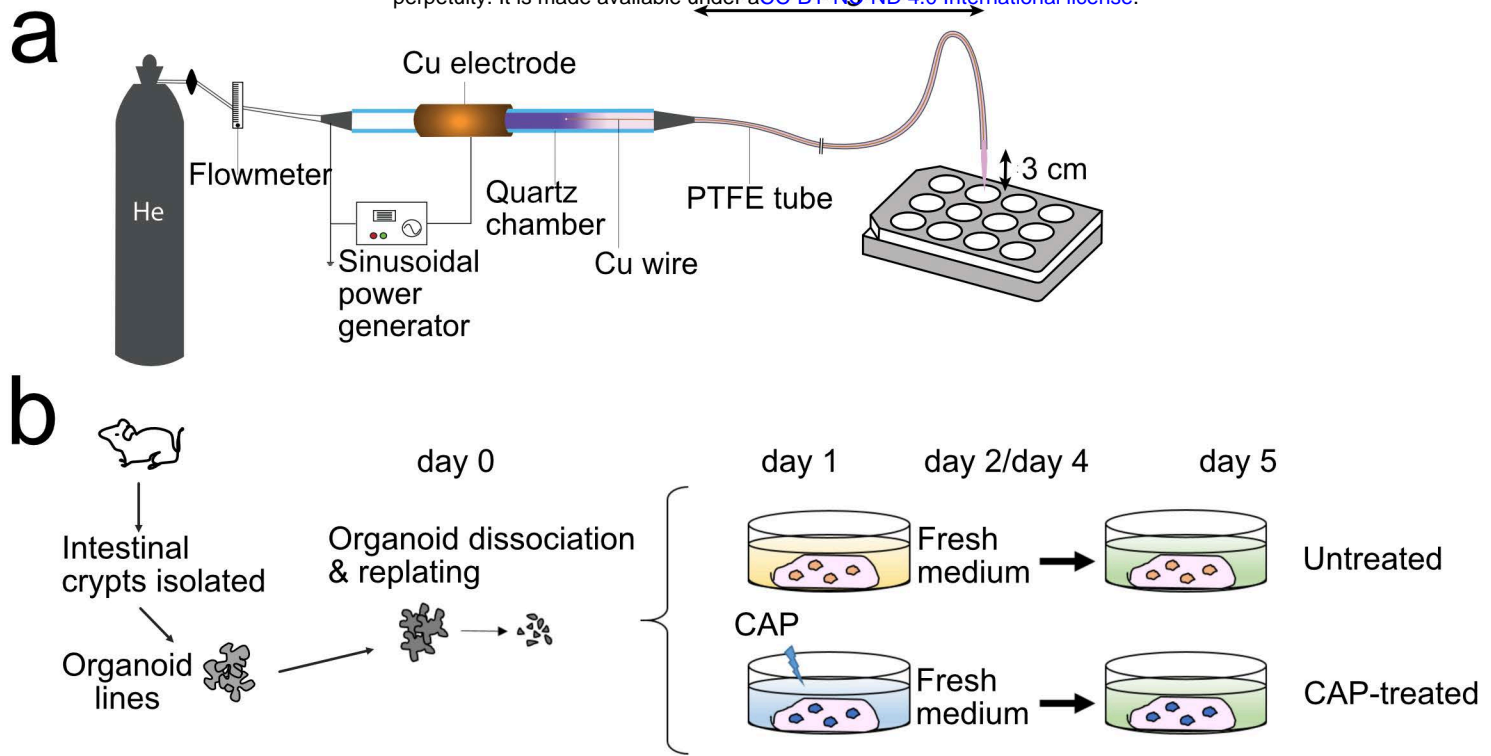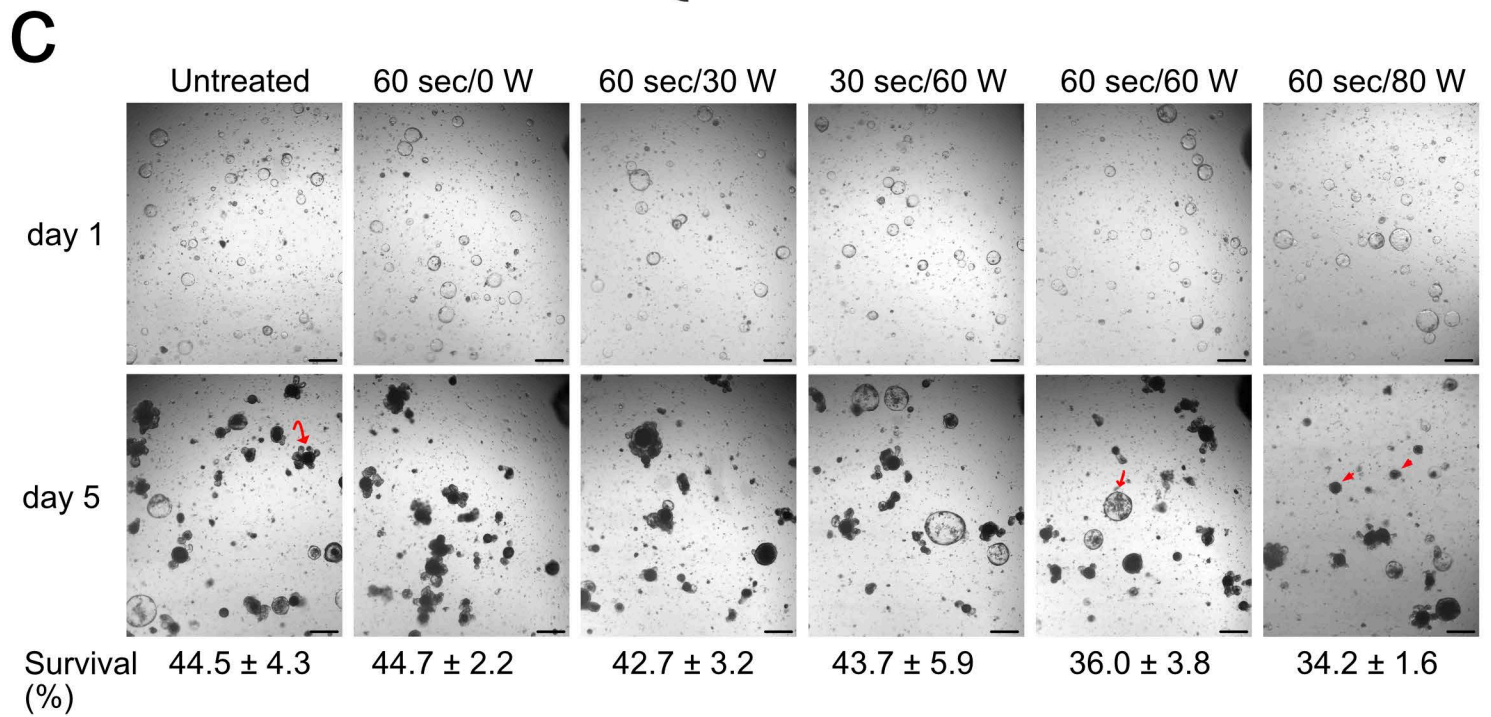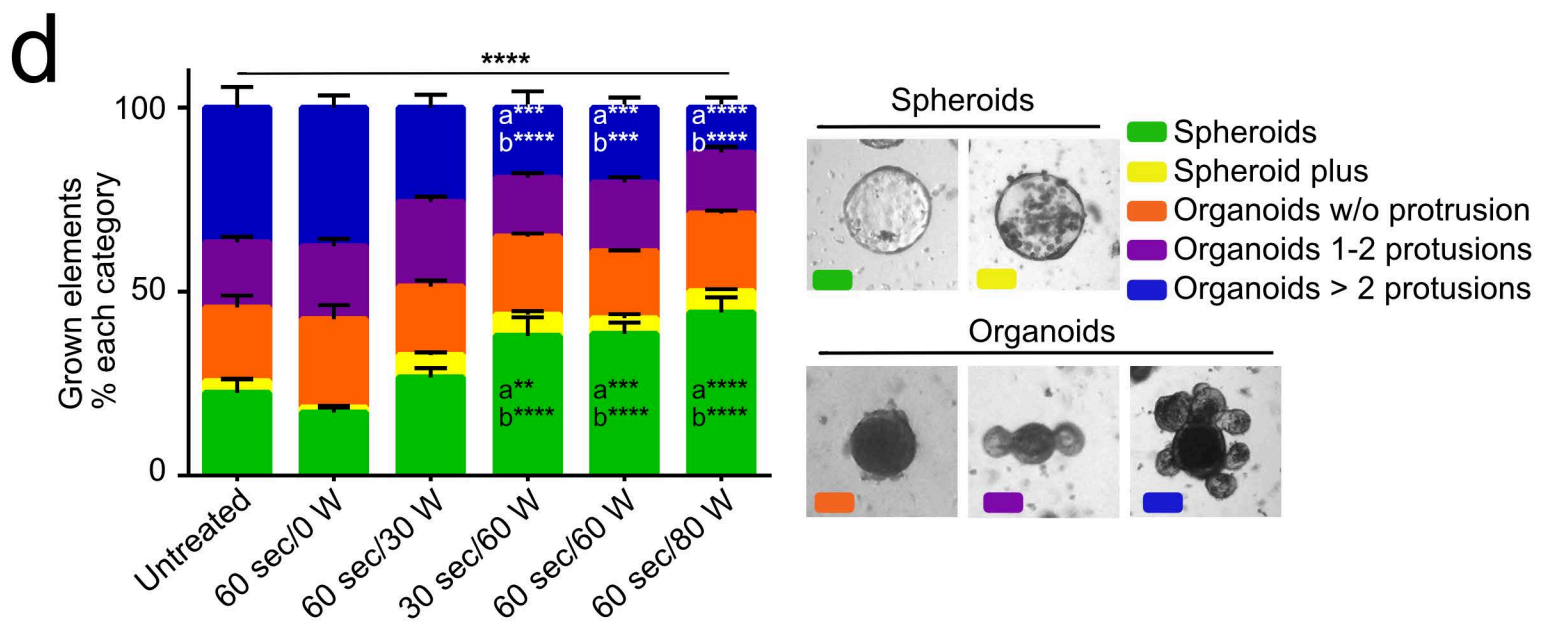



**a**

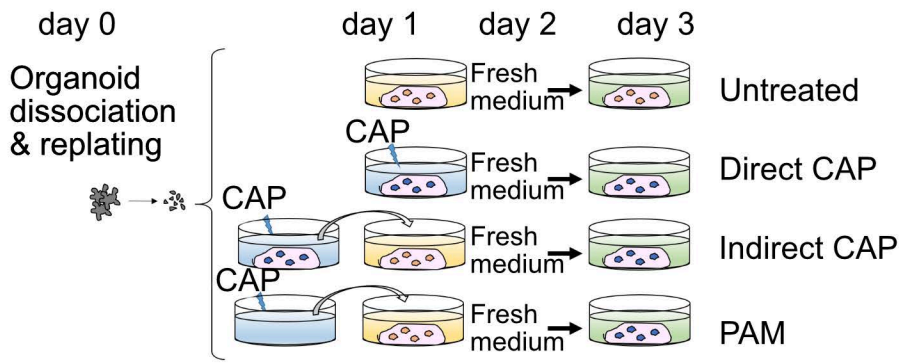

**b**

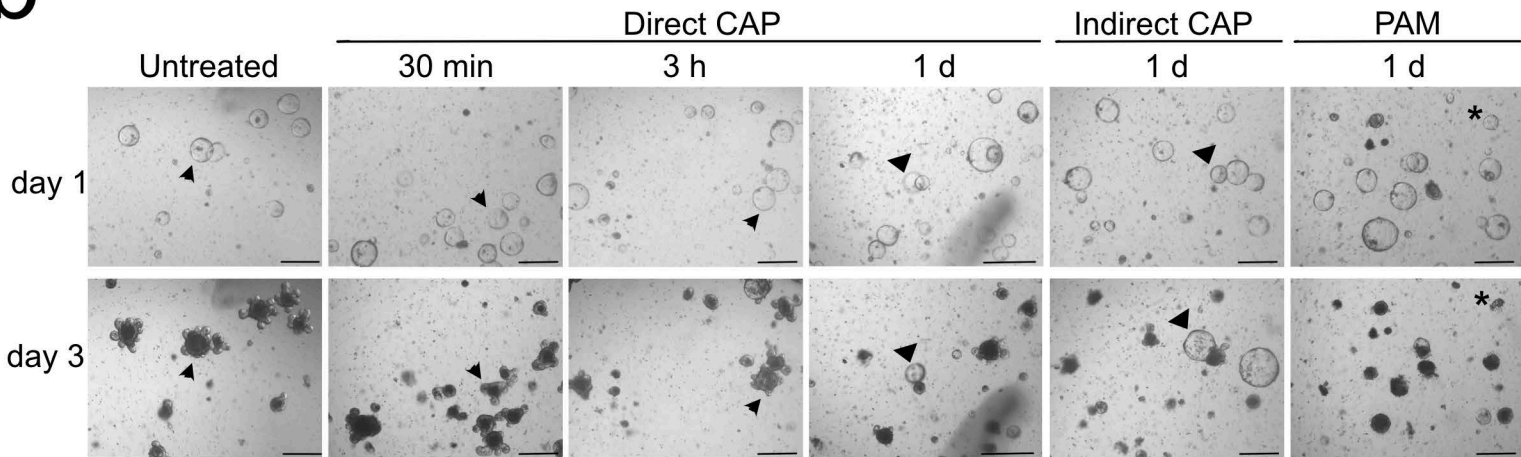

**c**

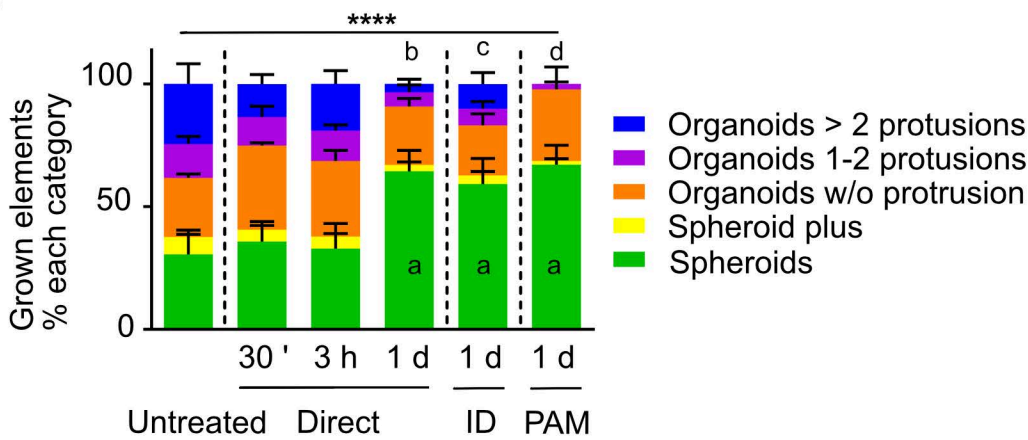

**d**

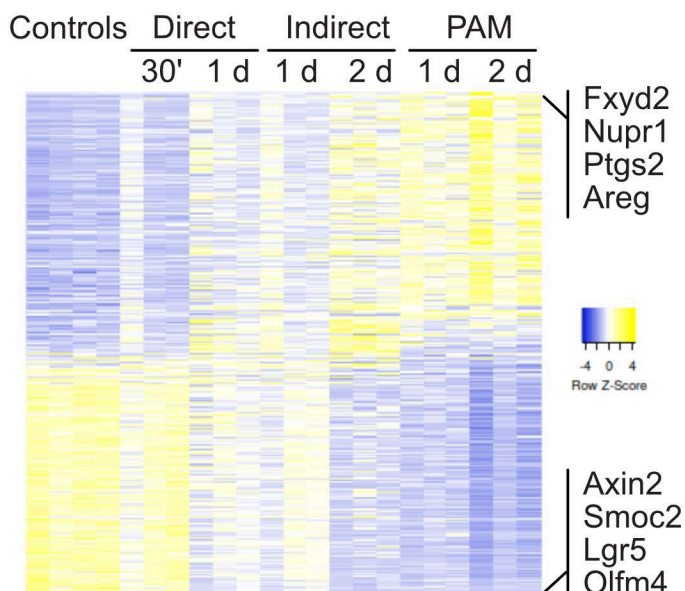

**e**

| Biological process                              |         |
|-------------------------------------------------|---------|
| <b>Upregulated in CAP-treated vs Controls</b>   | P-value |
| Regulation of intracellular signal transduction | e-52    |
| Cytoskeleton organization                       | e-51    |
| Apoptotic process                               | e-49    |
| Cell motility                                   | e-47    |
| Negative regulation of response to stimulus     | e-47    |
| Response to oxygen containing compounds         | e-42    |
| Secretion                                       | e-42    |
| Biological adhesion                             | e-38    |
| Positive regulation of developmental process    | e-38    |
| Regulation of cell differentiation              | e-37    |
| regulation of phosphorus metabolic process      | e-36    |
| <b>Downregulated in CAP-treated vs Controls</b> | P-value |
| Cell cycle                                      | e-139   |
| Cell cycle progress                             | e-122   |
| Chromosome organization                         | e-101   |
| Cell division                                   | e-83    |
| DNA replication                                 | e-78    |
| Cellular response to DNA damage stimulus        | e-69    |
| DNA repair                                      | e-56    |
| Chromosome segregation                          | e-55    |
| Organelle fission                               | e-54    |

**a**

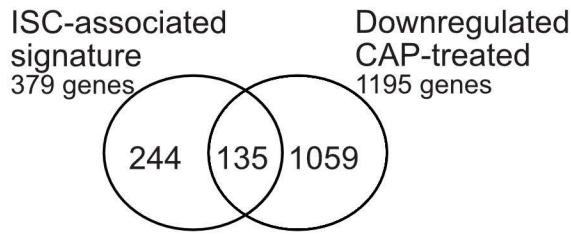

**b**

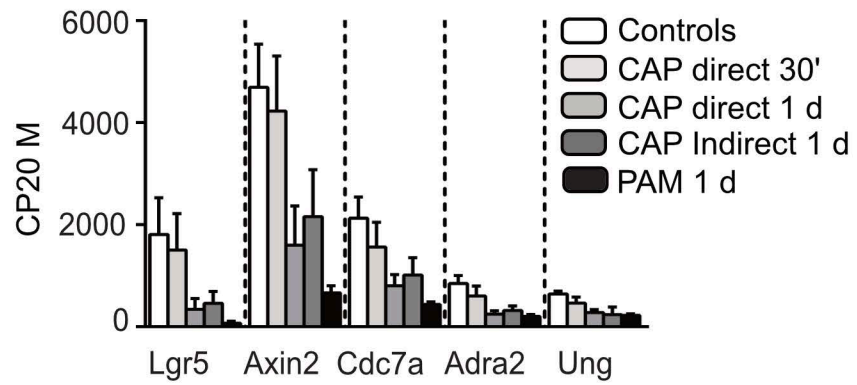

**c**

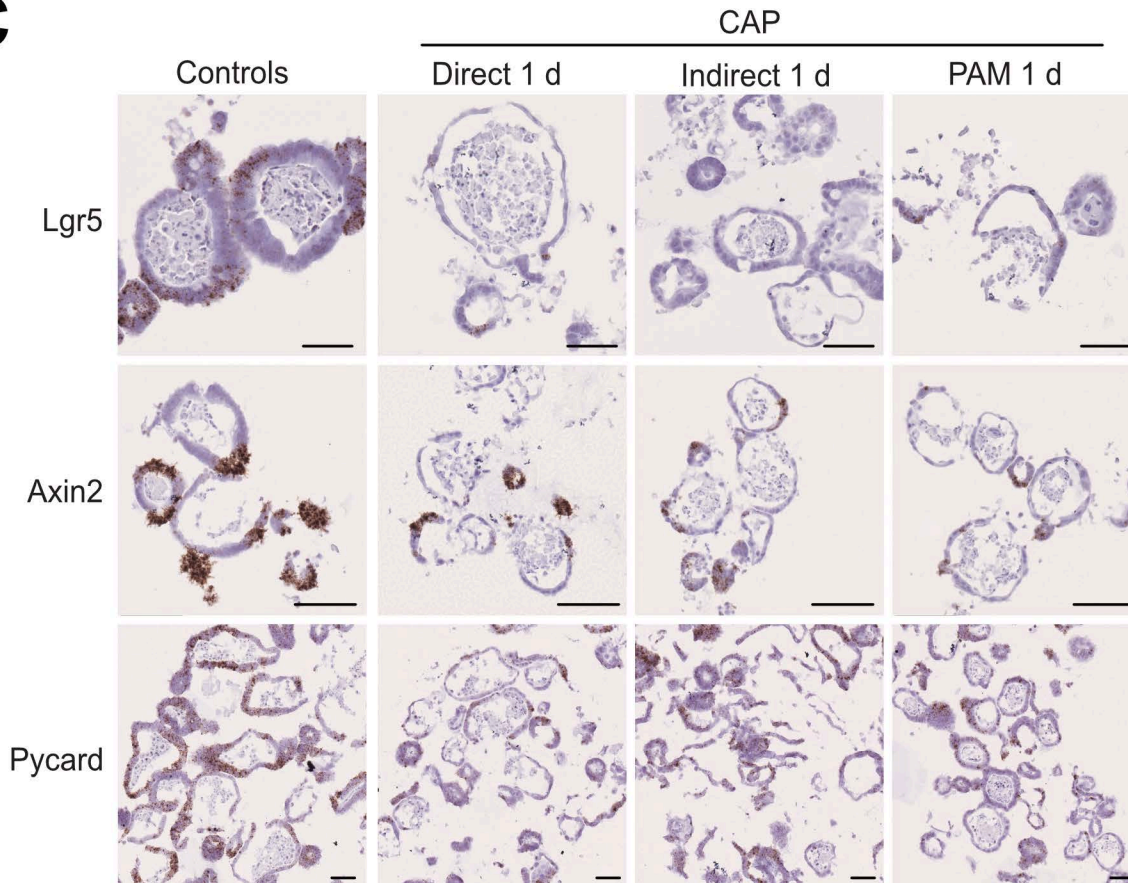

**d**

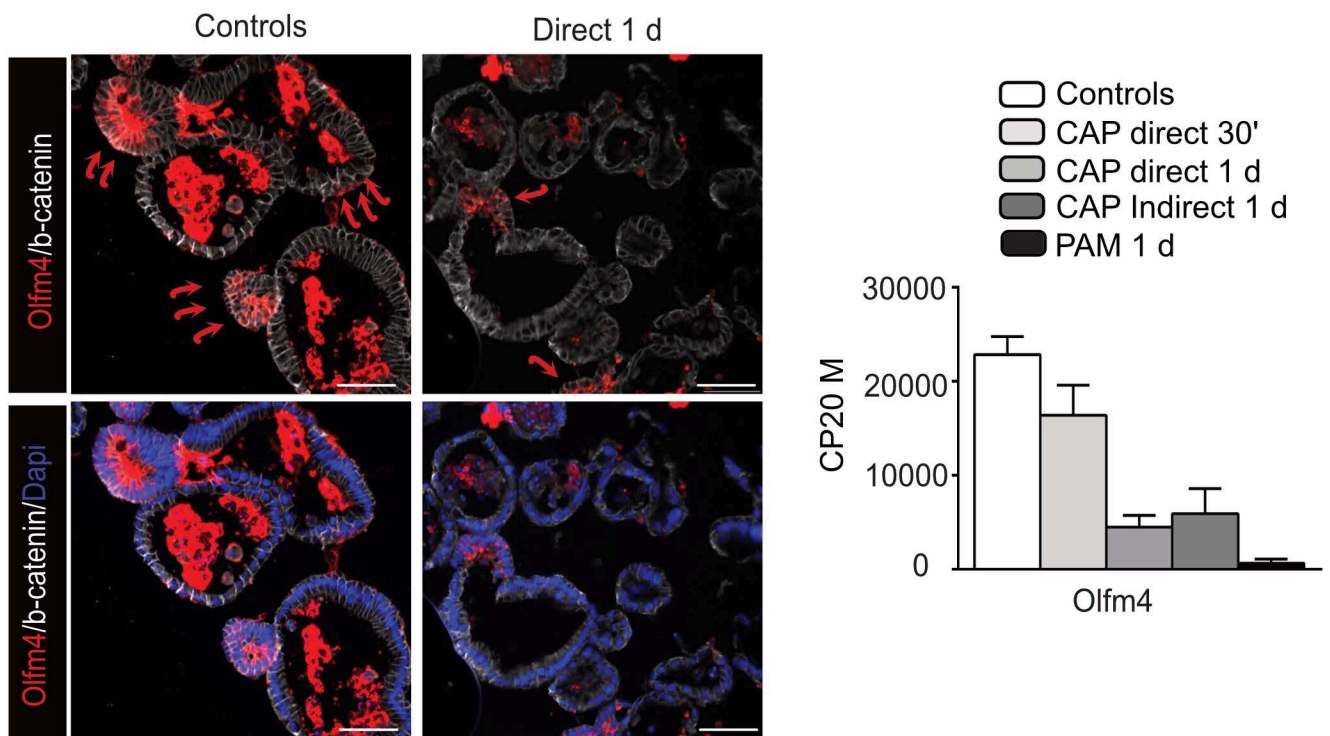



**a**

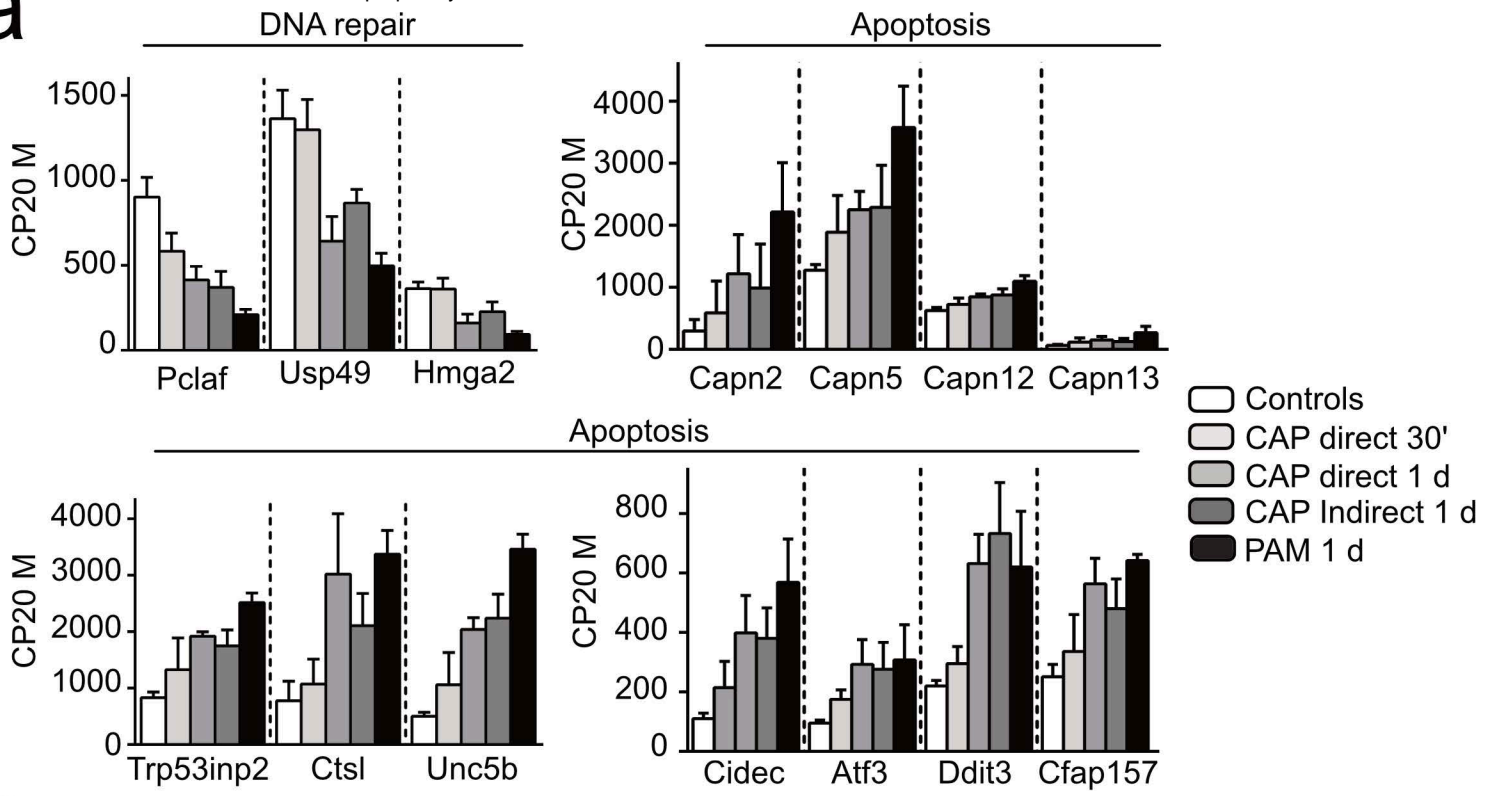

**b**

Controls      Direct 1 d      Indirect 1 d      PAM 1 d

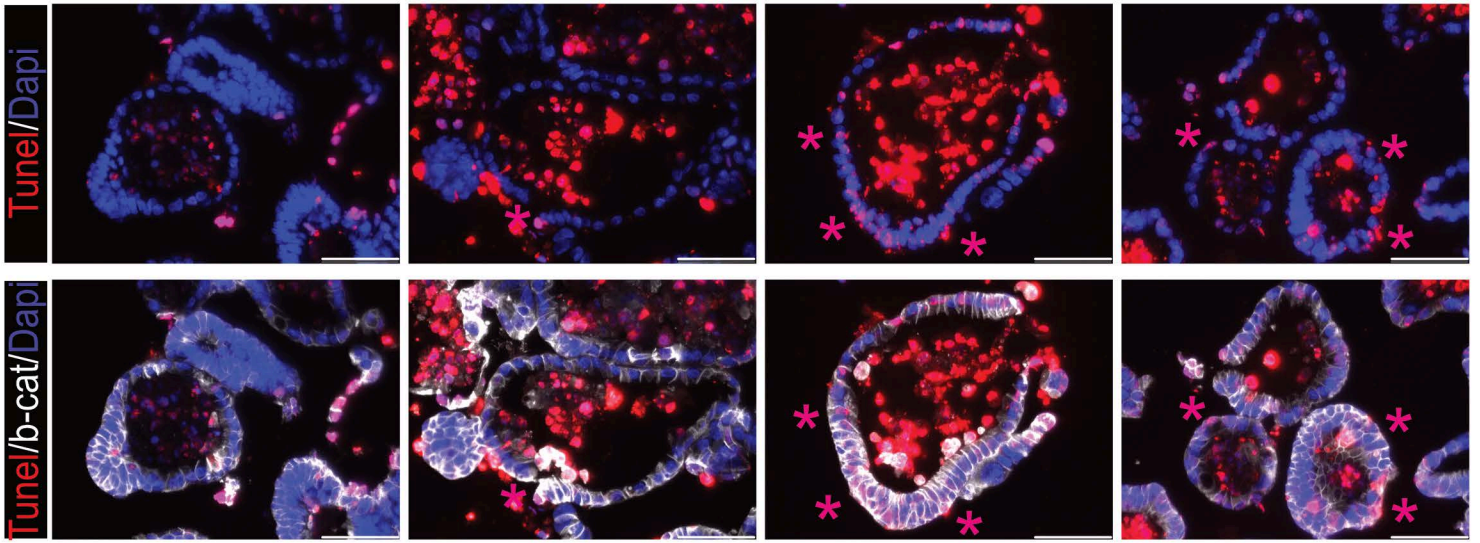

**a**

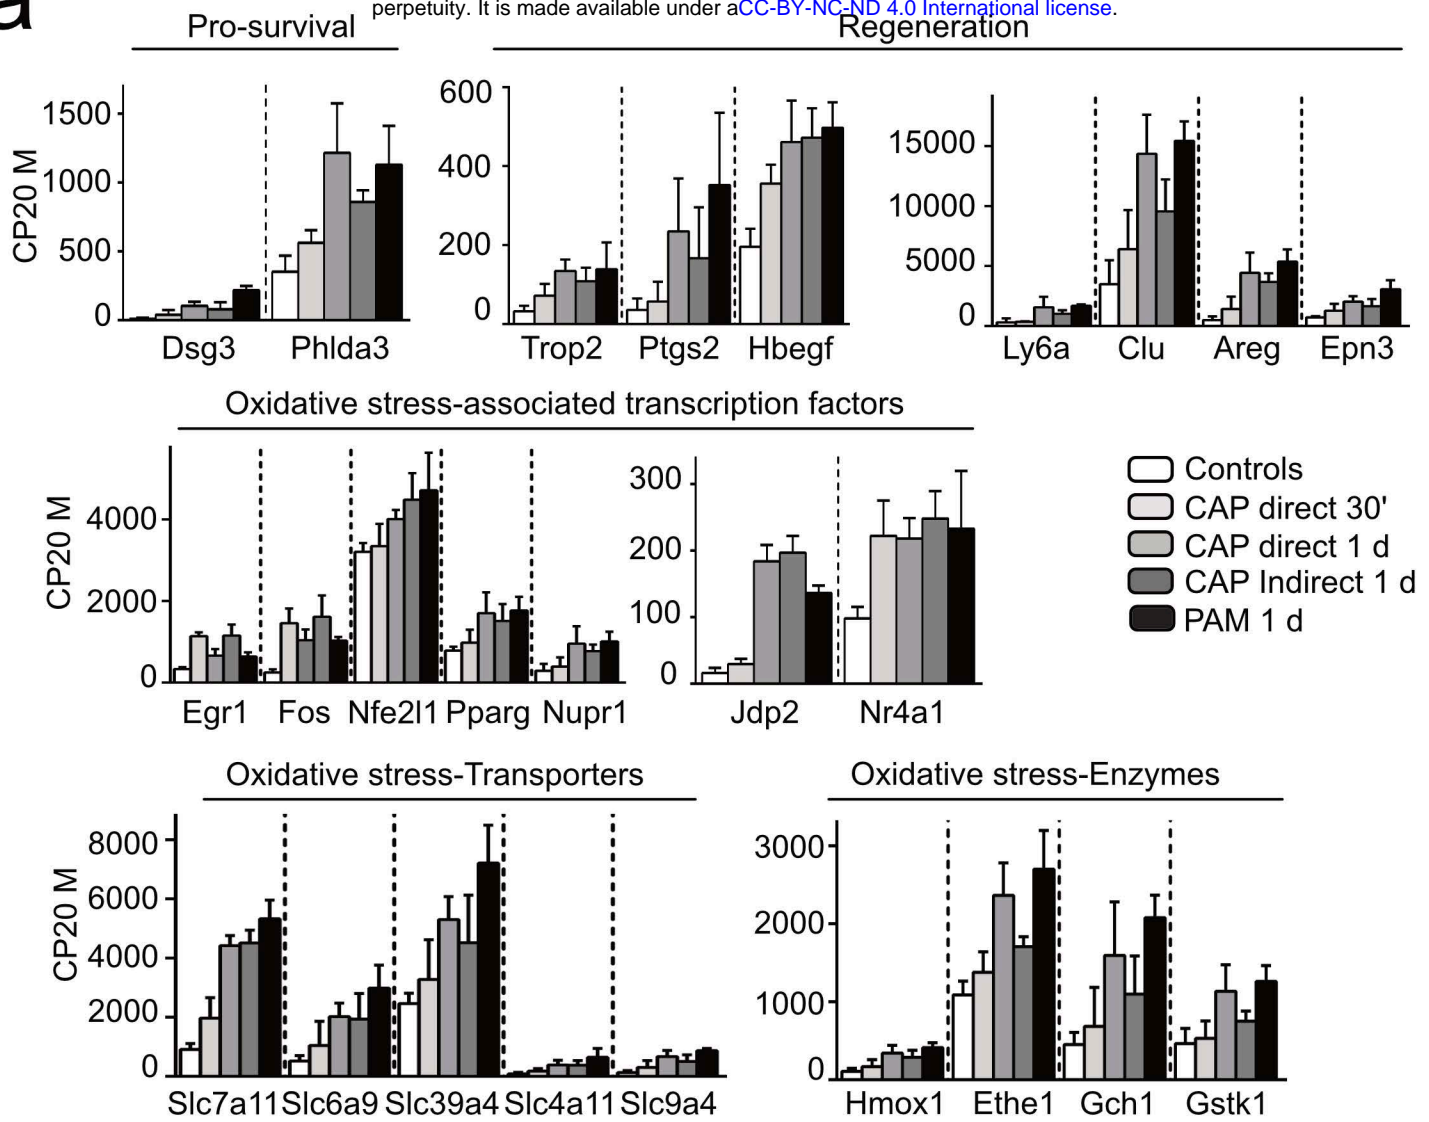

**b**

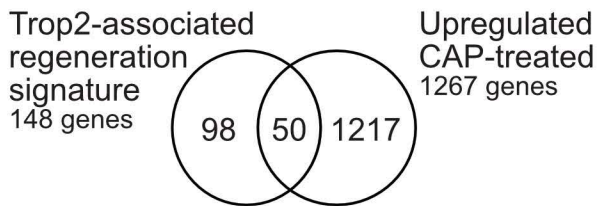

**c**

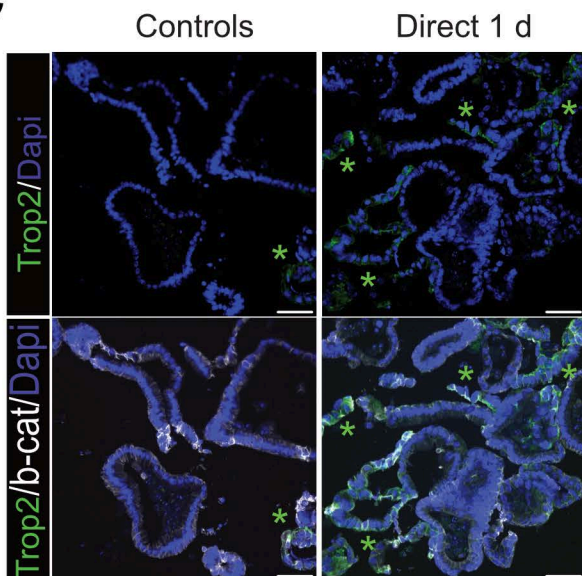

**d**

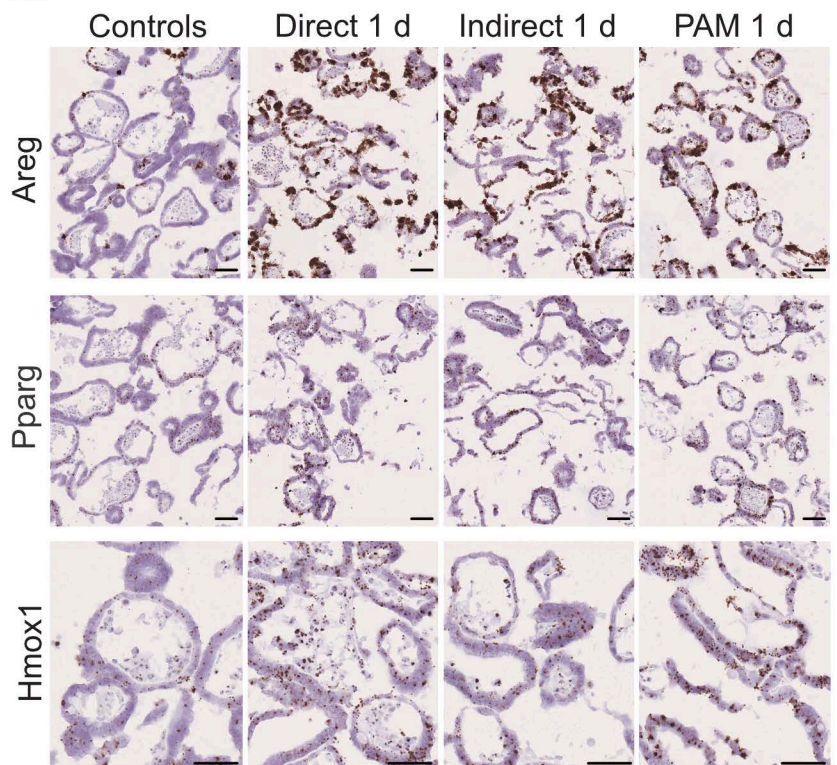



**a**

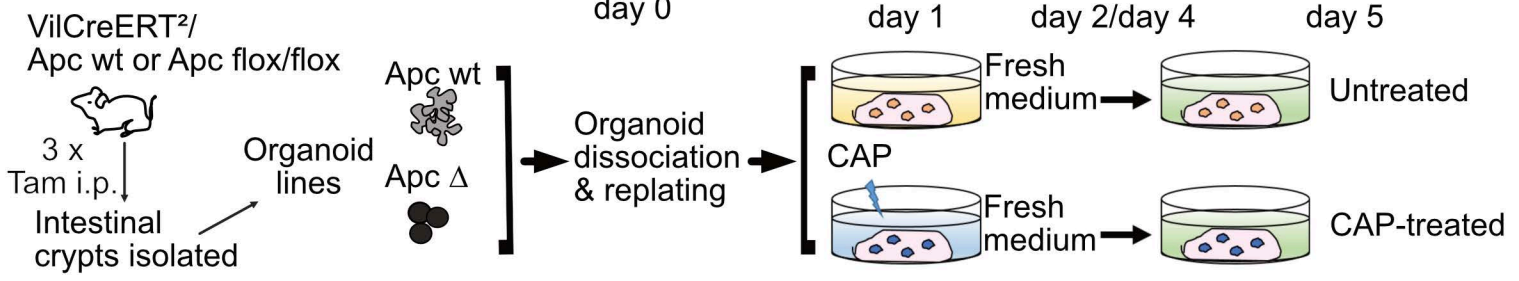

**b**

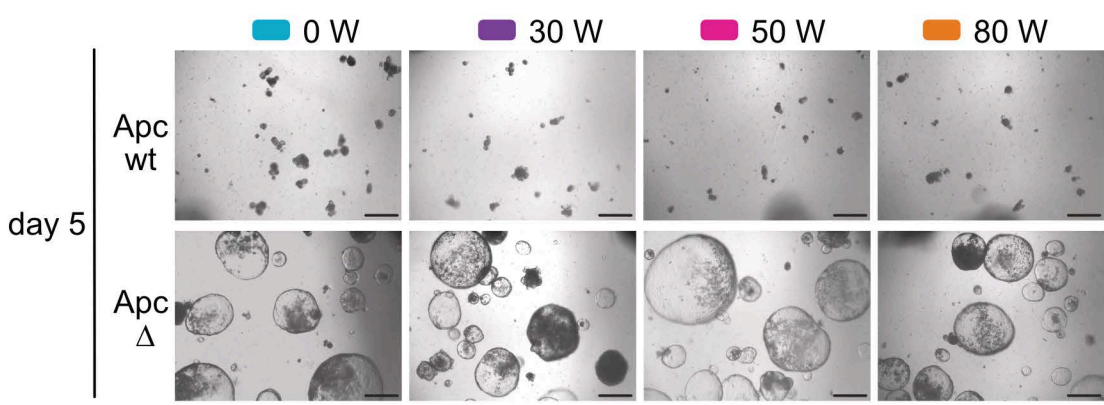

**c**

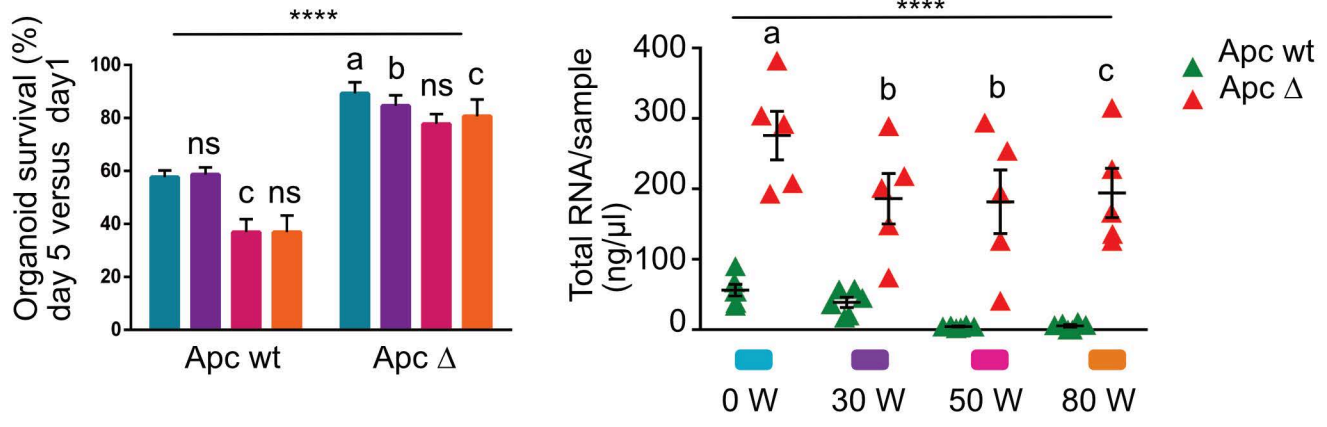

**d**

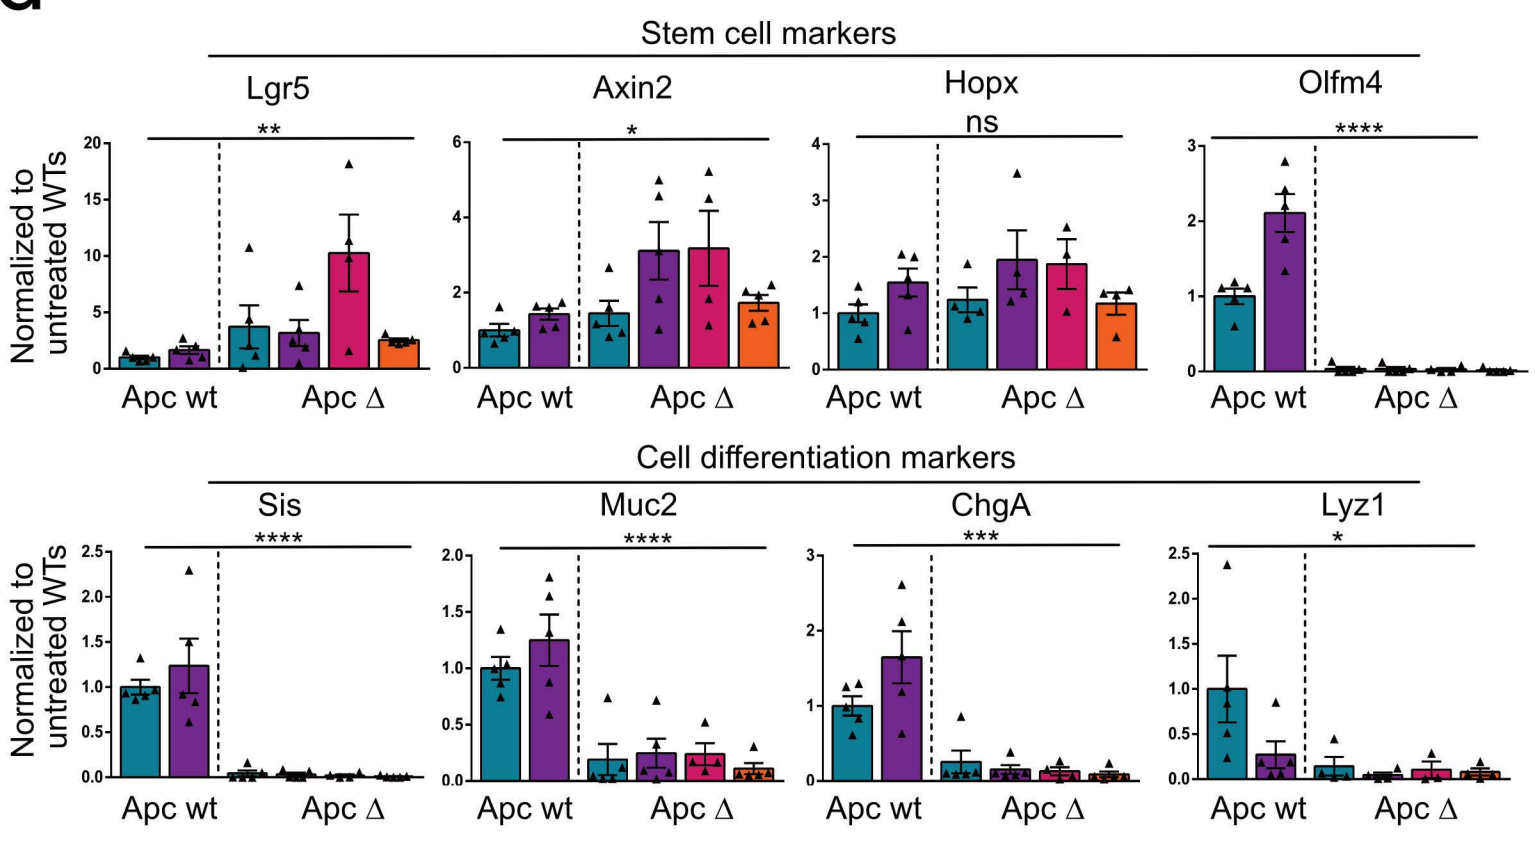

**a**

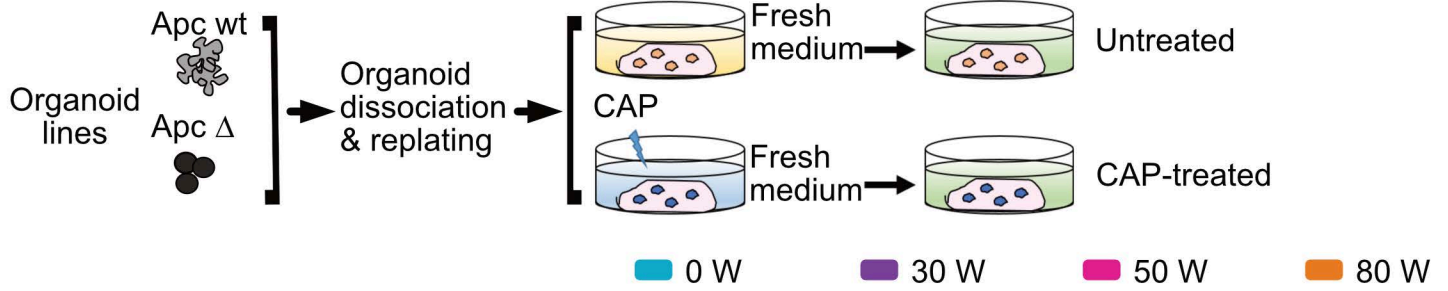

**b**

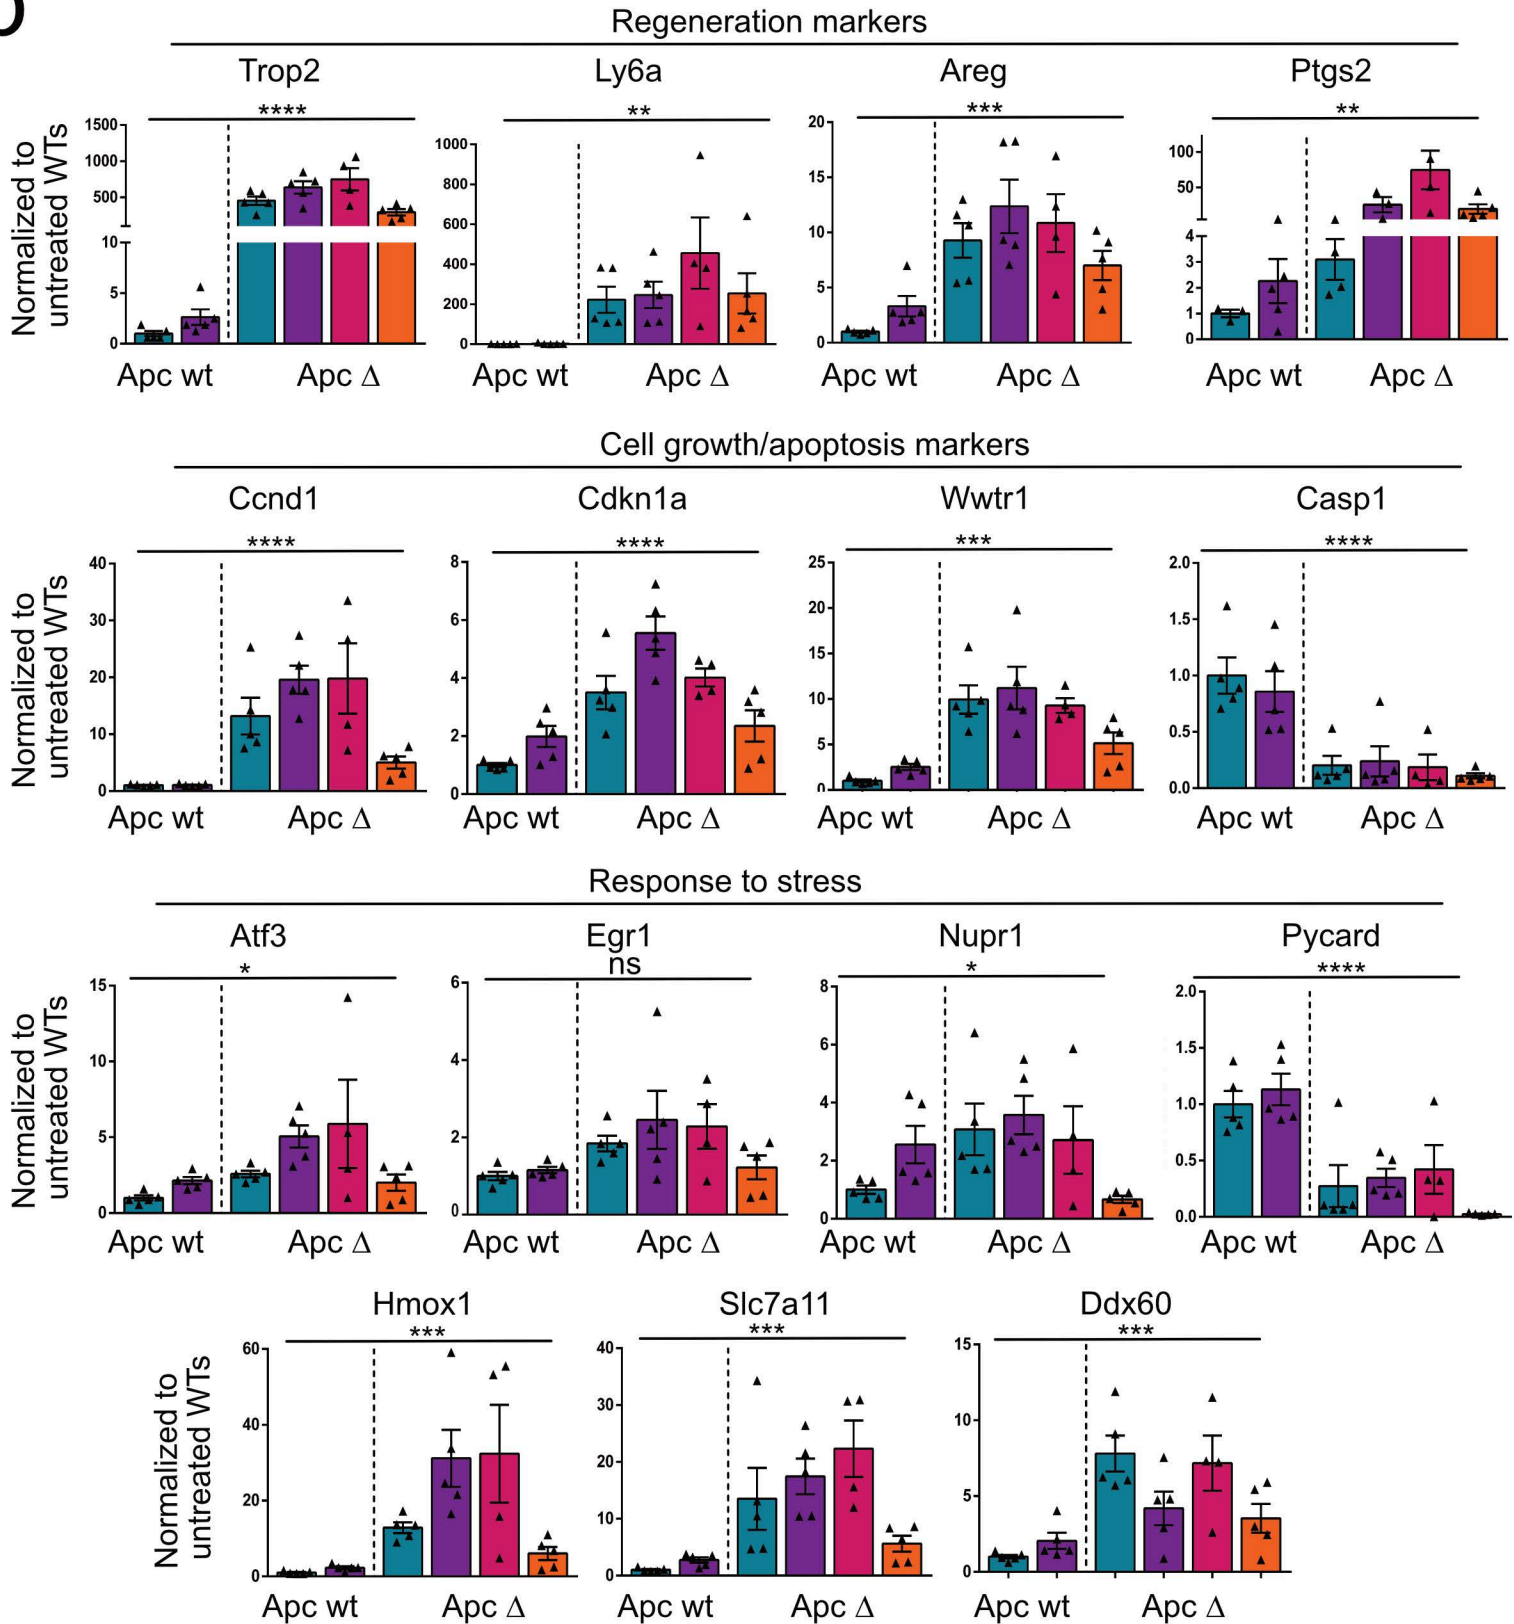





TABLE 2. List of material used for immunostainings, in situ hybridization and qRT-PCR experiments

| Immunostainings | Antibodies                 | Catalogue number              | Manufacturer                 |
|-----------------|----------------------------|-------------------------------|------------------------------|
|                 | Goat anti-Trop2            | AF650                         | R&D systems                  |
|                 | Mouse anti-Beta catenin    | 610154                        | BD transduction laboratories |
|                 | Rabbit anti-Olfactomedin 4 | #14369                        | cell signaling tech          |
|                 | <b>TUNEL assay</b>         | 12156792910                   | Roche                        |
|                 | <b>DAPI</b>                | D9542                         | Sigma-Aldrich                |
| RNAscope probes | Gene                       | Catalogue number              | Manufacturer                 |
|                 | m Areg                     | 430501                        | Advanced cell diagnostics    |
|                 | m Axin 2                   | 400331                        | Advanced cell diagnostics    |
|                 | m Hmox1                    | 498811                        | Advanced cell diagnostics    |
|                 | m Lgr5                     | 312171                        | Advanced cell diagnostics    |
|                 | m Pparg                    | 513371                        | Advanced cell diagnostics    |
|                 | m Pycard                   | 439581                        | Advanced cell diagnostics    |
| qPCR primers    | Gene                       | Forward primer                | Reverse primer               |
|                 | Aqp1                       | AGCTGGTACTGTGCGTTCTG          | GTAGTCAATCGCCAGCAGGT         |
|                 | Aqp3                       | TGCCTTGCCTAGCTACTTT           | GAAGCATCTCCCAACGA            |
|                 | Aqp4                       | TGCCGTAATCTGACTCCA            | AATGTCCACTTACCCACC           |
|                 | Aqp5                       | ATTGGCTTGTGTCGGTCACACT        | CCAGAAGACCCAGTGAGAGG         |
|                 | Areg                       | GCGAATGCAGATACATCGAGAA        | CGCTGTGAGTCTTCATGGATTTT      |
|                 | Atf3                       | GTCACCAAGTCTGAGGCGG           | GTTTCGACACTTGGCAGCAG         |
|                 | Axin2                      | TGACTCTCCTCCAGATCCCA          | TGCCCACTAGGCTGACA            |
|                 | Casp1                      | GACTGGGACCCTCAAGTTTGGCC       | CACCACCTCAGGATGGCCT          |
|                 | Ccnd1                      | CCTGCTACCGCACACGCAC           | GCCTGGCGCAGGCTTGACTC         |
|                 | Cdkn1a                     | ATCCTGCAAGAGGCTGGAGAGG        | CACGAGTCCGACGCTATGGA         |
|                 | Chga                       | TCCCCACTGCAGCATCCAGTTC        | CCTTCAGACGGCAGAGCTTCGG       |
|                 | Ddx60                      | AGTGATGAGCCTTTGTTGAGGA        | TCGTTTATGATGGCATCTCCC        |
|                 | Egr1                       | GAGCACCTGACCACAGAGTC          | GCGGCCAGTATAGGTGATGG         |
|                 | Hmox1                      | CATAGCCCGGAGCCTGAATC          | CAAATCCTGGGGCATGCTGT         |
|                 | Hopx                       | GTGCCTGCGATCTTGGTGGCT         | GCCTGACCTTACGTCTGTCCCG       |
|                 | Lgr5                       | CCTACTCGAAGACTTACCCAGT        | GCATTGGGGTGAATGATAGCA        |
|                 | Ly6A                       | GAAAGAGCTCAGGGACTGGAGTGTT     | TTAGGAGGGCAGATGGGTAAGCAA     |
|                 | Lyz1                       | GAGACCGAAGCACCAGCTATG         | CGGTTTTGACATTGTGTTTCGC       |
|                 | Muc2                       | ATGCCCACTCCTCAAAGAC           | GTAGTTCCGTTGGAACAGTGAA       |
|                 | Nupr1                      | AATACCAACCGCCCTAGCC           | TGTGGTCTGGCCTTATCTCC         |
|                 | Olfm4                      | CAGCTGCCTGGTTGCCTCCG          | GGCAGGTCCCATGCTGTCC          |
|                 | Ptgs2                      | CTGACCCCAAGGCTCAAAT           | TTTAAGTCCACTCCATGGCCC        |
|                 | Pycard                     | GAGCAGCTGCAAACGACTAA          | CTGGTCCCAAAGTGTCTGT          |
|                 | Rpl13                      | CCCGTGGCGATTGTGAA             | TCATTGTCTTCTGTGCAGGTT        |
|                 | Sis                        | TTCAAGAAATCACAACTTCAATTTACTAG | CTAAAACCTTCTTTGACATTTGAGCAA  |
|                 | Slc7a11                    | AGCTAACTGACTGCCCTGG           | ACTCAGAGGTGTGTTTCAGCC        |
|                 | Trop2                      | AGAACGCGTCGCAGAAGGGC          | CGGCGGCCATGAACAGTGA          |
|                 | Wwtr1                      | CGGTTCCGGGGATGTAAGAG          | GAAGTACGAGCTGGAACCC          |
|                 | Ywhaz                      | TGCAACGATCTACTGTCTCTTTG       | CGGTAGTAGTACCCTTCATTTCA      |



## SUPPLEMENTARY FIGURE LEGENDS

**Figure S1. Impact of the CAP application method on organoid morphology.** **a.** CAP-conditioned media and PAM generated by treatment with 50 W for 60 s at day 1 were applied directly to organoid cultures at day 2 post-replating for 24 hours (until day 3). **b.** Representative pictures of a given field showing growth of organoids at day 2 (before CAP application) and day 3 (endpoint of the experiment). Triangles show individual elements evolving as protruded organoids and spheroids in untreated and CAP-treated cultures, respectively. Right panels: insets of the pictures at day 3. Scale bars: 500  $\mu\text{m}$ . **c.** Quantification of organoid complexity at day 3. An average number of 100 elements was analyzed over time per condition per organoid line ( $n = 4$  organoid lines). Data are represented as means  $\pm$  sem. Two-way ANOVA: interaction \*\*  $P < 0.01$  followed by Dunnett's multiple comparisons test: \*\*\*  $P < 0.001$ , \*\*  $P < 0.01$ , \*  $P < 0.05$ , ns not significant (all compared to untreated).

**Figure S2. Impact of the CAP application method on global gene expression of intestinal organoids.** **a.** Heatmap of the most differentially regulated genes in CAP-treated versus Untreated (Controls) organoids at the early time post-treatment (30 min). **b.** Expression levels of Cys metabolism-, cell signaling-, inflammation- and cytoskeleton organization-associated genes in the various conditions. Data are represented as means  $\pm$  sd.  $n = 4$  and 3 samples in Controls and CAP-treated conditions, respectively. CP20M: counts per kilobase of transcript per 20 million mapped reads.

**Figure S3. Apc deficient-derived organoids exhibit increased resistance to CAP treatment as compared to normal intestinal stem cell-derived organoids.**

**a.** Organoid growth of Apc wt and Apc  $\Delta$  crypts upon initial seeding in culture media containing ENR (EGF, Noggin, Rspodin1) or EN (EGF, Noggin). Representative pictures of a given field showing organoid morphology at day 1 and day 4. Apc  $\Delta$  organoid efficiently grow in EN conditions as compared to Apc wt organoids. Scale bars: 500  $\mu\text{m}$ . **b.** Measurement of reactive species in culture supernatants of

Apc wt and Apc  $\Delta$  organoids 24 hours after direct CAP treatment at the indicated doses. DCFDA dye was used to measure ROS levels. A.U. Arbitrary Units. Each symbol corresponds to a given organoid line. Data are represented as means  $\pm$  sem. One-way Anova test. \*\*\*\* P < 0.0001. **c.** Expression levels of aquaporin-encoding genes. Left panel: Aqp expression in Lgr5+ve ISC. Data were analyzed from the Gene Expression Omnibus GSE135362 dataset; Right panel: Aqp expression in control and CAP-treated organoids (this work). CP20M: counts per kilobase of transcript per 20 million mapped reads (n = 2 samples). **d.** Gene expression analysis by qRT-PCR of Aquaporins in Apc wt and Apc  $\Delta$  organoids. Each symbol corresponds to a given organoid line. Values are normalized to Untreated Apc wt levels. Data are represented as means  $\pm$  sem. One-way Anova test. \*\*\*\* P < 0.0001; \*\*\* P < 0.001. **e.** Expression levels of ROS scavenger enzymes in Lgr5+ve ISC. Data were analyzed from the Gene Expression Omnibus GSE135362 dataset. CP20M: counts per kilobase of transcript per 20 million mapped reads (n = 2 samples).



**a**

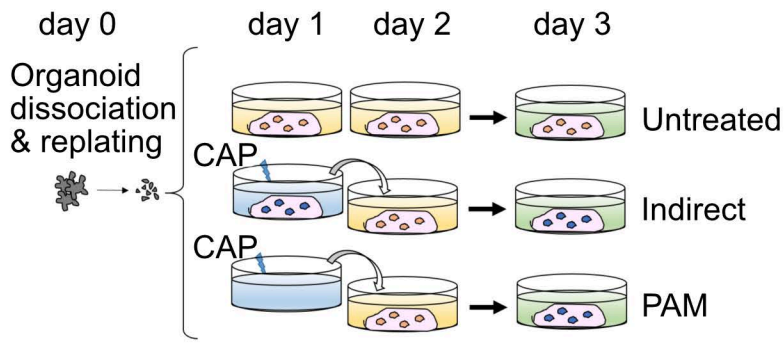

**b**

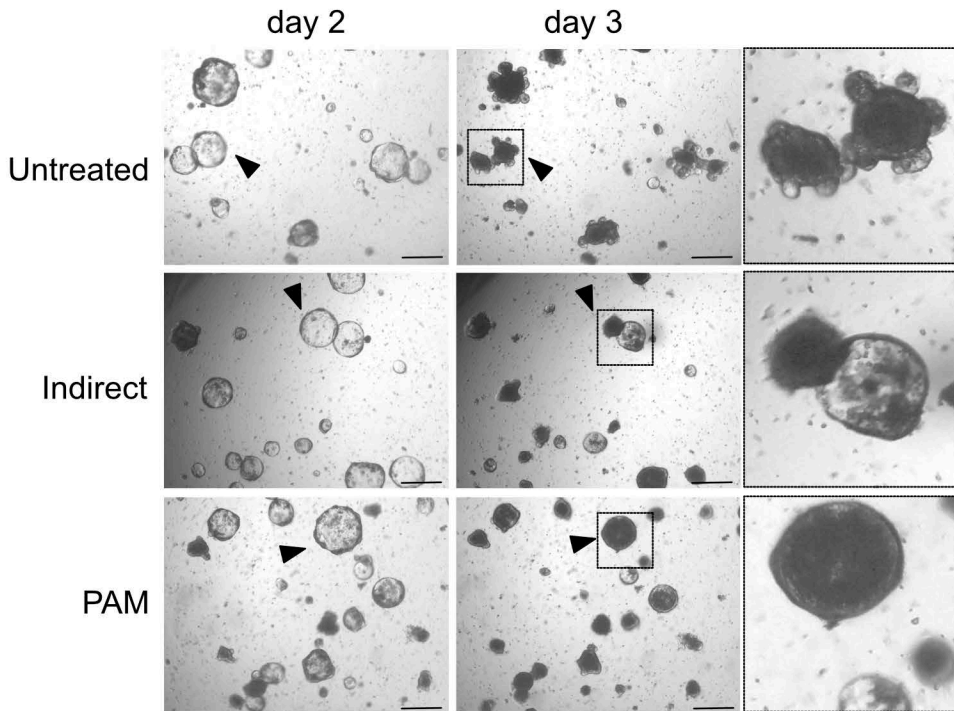

**c**

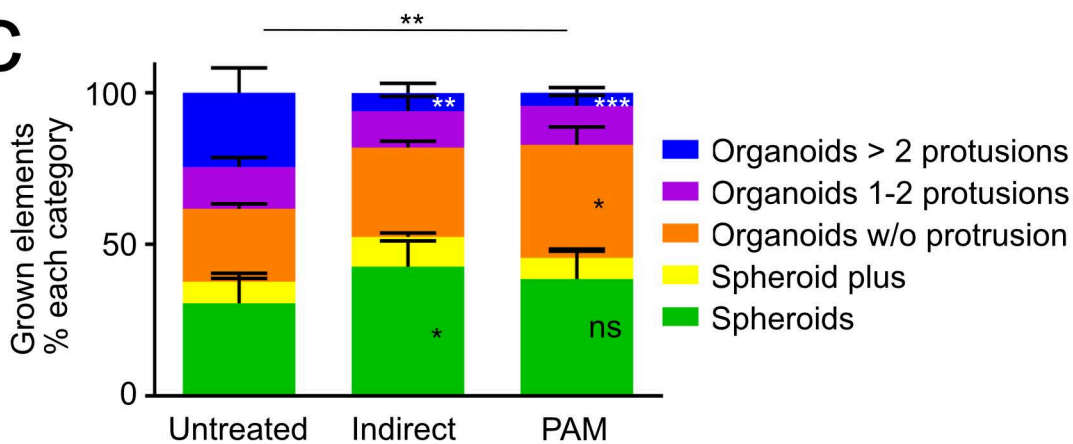

**a**

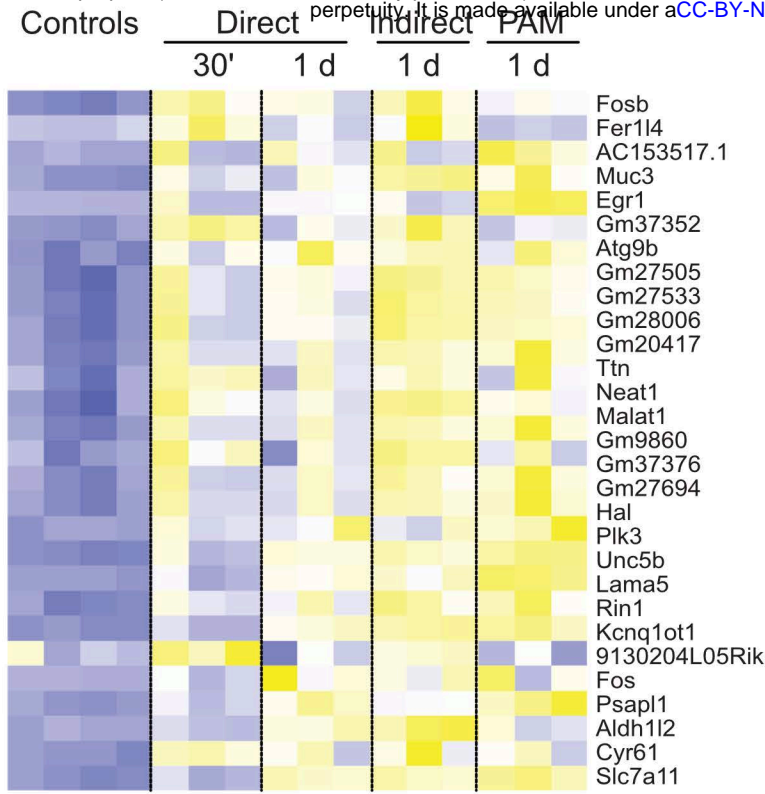

**b**

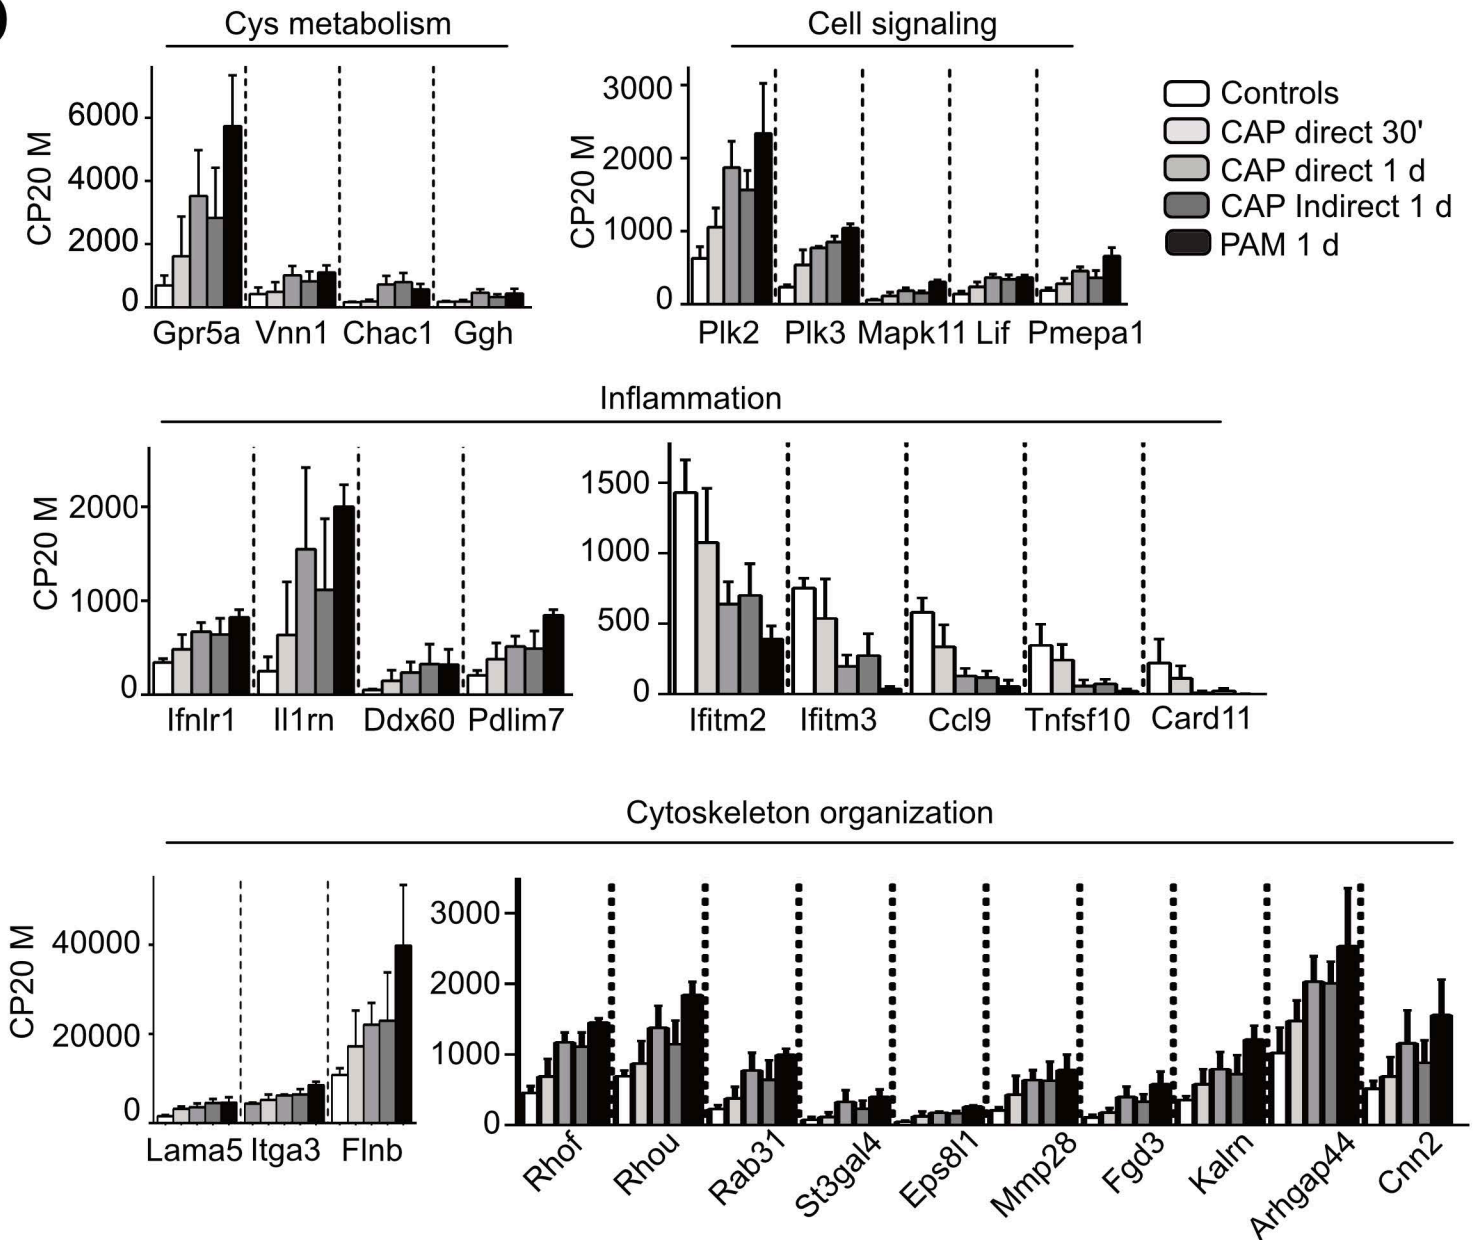

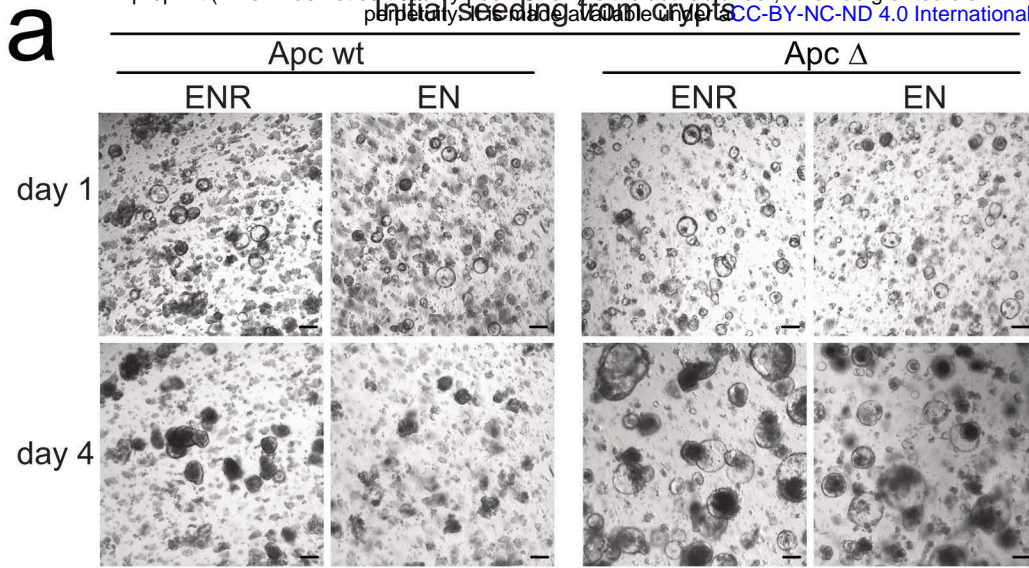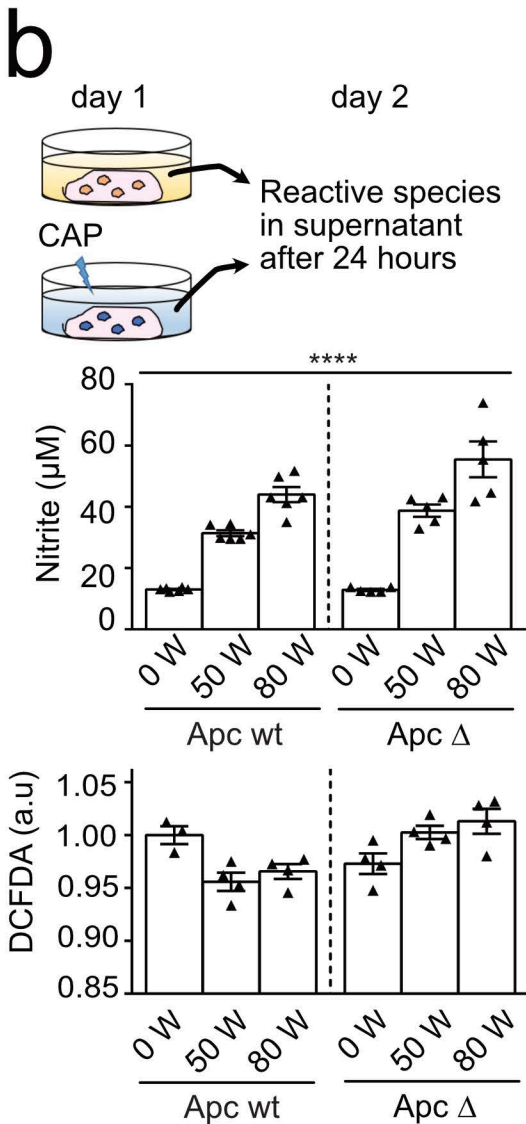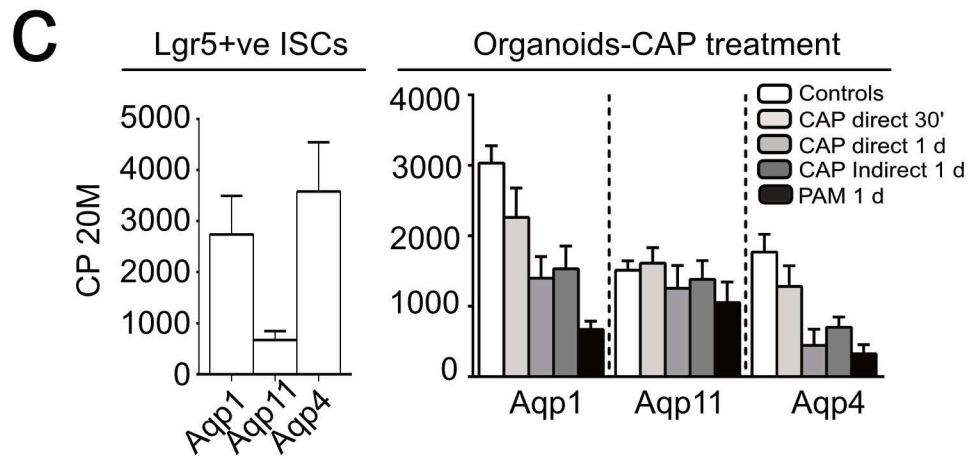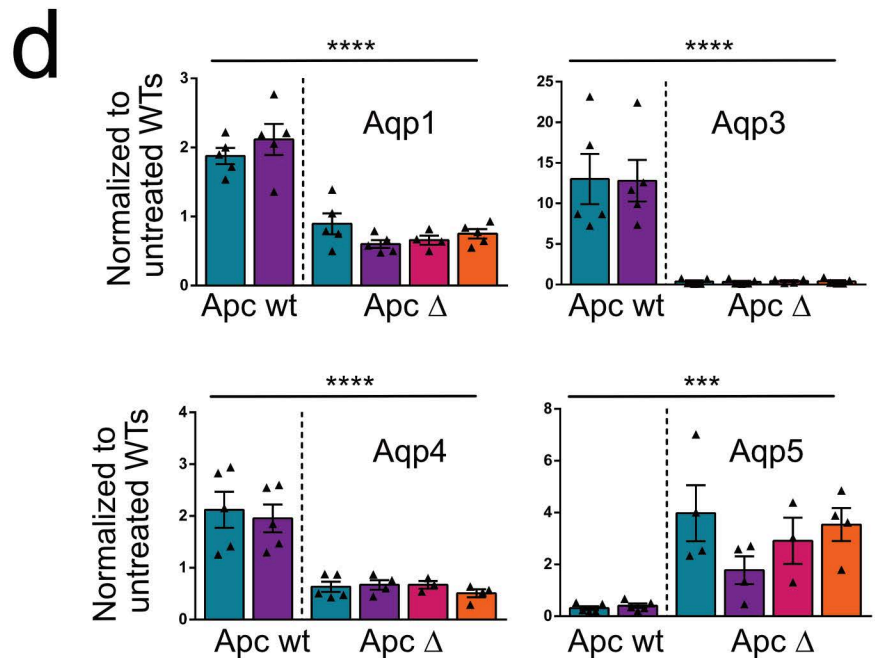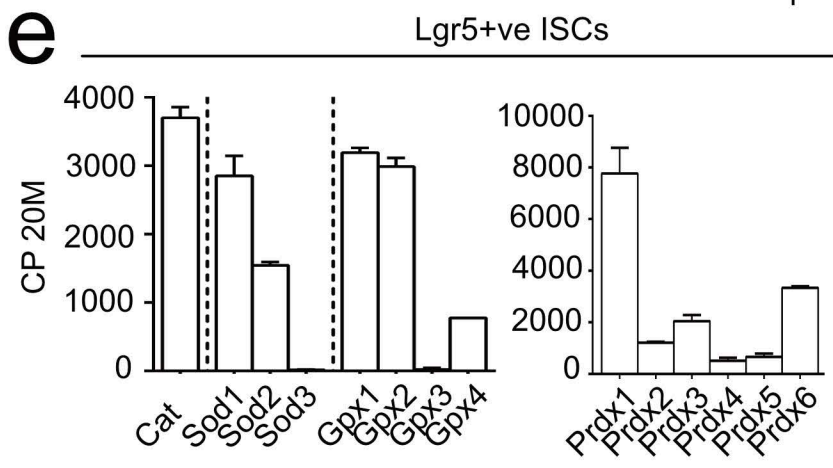

Source: https://www.biorxiv.org/content/10.1101/2021.10.13.464287v1.full.pdf
